# Supplementary material for: Proteomic Analysis of the Cyst Stage of Entamoeba histolytica
Source: PLoS Negl Trop Dis. 2012 May 8;6(5):e1643. doi: 10.1371/journal.pntd.0001643 (PMC3348168; doi:10.1371/journal.pntd.0001643)
Supplement: Table S1 — Proteins detected in sample AM951 using two different processing methods prior to LC-MS/MS experiments. (XLSX) [file pntd.0001643.s004.xlsx]

## Sheet: Table S1
E. histolytica Locus ID	Annotation	Detected in sample processed by approach: S = Sonication only; FS = Freeze-thaw-sonication
EHI_007330	hexosaminidase alpha chain	S
EHI_010380	hypothetical protein	S
EHI_017610	hypothetical protein, conserved	S
EHI_019160	hypothetical protein	S
EHI_025410	hypothetical protein	S
EHI_038930	Beige/BEACH domain protein, putative	S
EHI_040610	hypothetical protein	S
EHI_059040	protein kinase domain containing protein	S
EHI_059830	cysteine protease binding protein family 8, putative	S
EHI_065320	heat shock protein 70, putative	S
EHI_065330	Gal/GalNAc lectin subunit Igl2	S
EHI_066770	Skp1 protein, putative	S
EHI_069380	hypothetical protein, conserved	S
EHI_073470	ADP-ribosylation factor, putative	S
EHI_076850	leucine rich repeat protein	S
EHI_086140	Gtpase-activating protein (GAP)	S
EHI_092290	hypothetical protein, conserved	S
EHI_099730	60S ribosomal protein L13, putative	S
EHI_101240	nucleic acid binding related	S
EHI_103840	DNA repair protein RAD54, putative	S
EHI_104630	filamin 2	S
EHI_105330	coronin, putative	S
EHI_107030	hypothetical protein, conserved	S
EHI_110180	myosin heavy chain	S
EHI_110230	hypothetical protein	S
EHI_114130	protein kinase domain containing protein	S
EHI_117680	protein kinase, putative	S
EHI_120590	hypothetical protein	S
EHI_129890	type A flavoprotein	S
EHI_135790	60S ribosomal protein L10a, putative	S
EHI_137840	WD repeat protein	S
EHI_140180	hypothetical protein	S
EHI_140330	protein kinase, putative	S
EHI_145970	Metallo-beta-lactamase, putative	S
EHI_148680	Predicted permease, putative	S
EHI_149900	Rab GTPase activating protein, putative	S
EHI_155210	hypothetical protein	S
EHI_158580	hypothetical protein	S
EHI_161970	leucyl-tRNA synthetase, putative	S
EHI_166920	hypothetical protein	S
EHI_169700	cysteinyl-tRNA synthetase, putative	S
EHI_174270	hypothetical protein	S
EHI_174910	ARP2 3 complex 21 kDa subunit, putative	S
EHI_180150	protein kinase, putative	S
EHI_185270	Dedicator of cytokinesis domain containing protein	S
EHI_185280	phosphoglucomutase phosphomannomutase family protein	S
EHI_185590	hypothetical protein	S
EHI_193070	hypothetical protein	S
EHI_197310	hypothetical protein	S
EHI_003940	40S ribosomal protein S4	FS
EHI_008200	glyceraldehyde-3-phosphate dehydrogenase, putative	FS
EHI_012330	serine-threonine-isoleucine rich protein	FS
EHI_013960	DEAD/DEAH box helicase, putative	FS
EHI_016340	hypothetical protein	FS
EHI_030880	cyclin, putative	FS
EHI_031370	hypothetical protein	FS
EHI_038630	TBC domain containing protein, putative	FS
EHI_042170	aminoacyl-histidine dipeptidase, putative	FS
EHI_051830	hypothetical protein	FS
EHI_053200	DNA double-strand break repair Rad50 ATPase, putative	FS
EHI_064490	protein kinase, putative	FS
EHI_068140	hypothetical protein	FS
EHI_068350	protein kinase, putative	FS
EHI_072130	lipase, putative	FS
EHI_086120	40S ribosomal protein S18, putative	FS
EHI_092210	hypothetical protein	FS
EHI_093820	RNA polymerase I associated factor, putative	FS
EHI_118660	hypothetical protein	FS
EHI_137950	hypothetical protein	FS
EHI_140310	hypothetical protein	FS
EHI_140320	protein kinase, putative	FS
EHI_142080	glycosyltransferase, putative	FS
EHI_147530	DNA primase large subunit, putative	FS
EHI_159160	superoxide dismutase [Fe]	FS
EHI_164410	exportin, putative	FS
EHI_164770	hypothetical protein	FS
EHI_183510	nuclear pore protein, putative	FS
EHI_199110	lysozyme, putative	FS
EHI_004600	hydroxylamine reductase, putative	S, FS
EHI_006810	14-3-3 protein 3	S, FS
EHI_009530	pyruvate phosphate dikinase	S, FS
EHI_012500	coatomer gamma subunit, putative	S, FS
EHI_013210	hypothetical protein	S, FS
EHI_020280	40S ribosomal protein S2, putative	S, FS
EHI_033250	polyadenylate-binding protein, putative	S, FS
EHI_040580	hypothetical protein	S, FS
EHI_048540	hypothetical protein	S, FS
EHI_050820	protein kinase, putative	S, FS
EHI_051060	pyruvate:ferredoxin oxidoreductase	S, FS
EHI_052860	heat shock protein 70, putative	S, FS
EHI_053190	hypothetical protein, conserved	S, FS
EHI_060740	URE3-BP sequence specific DNA binding protein	S, FS
EHI_061980	peroxiredoxin	S, FS
EHI_068660	60S ribosomal protein L5, putative	S, FS
EHI_081430	adenylylcyclase-associated protein	S, FS
EHI_083270	ubiquitin	S, FS
EHI_087570	endoribonuclease L-PSP, putative	S, FS
EHI_087690	hypothetical protein	S, FS
EHI_098570	fructose-1,6-bisphosphate aldolase, putative	S, FS
EHI_102170	translation elongation factor 1-alpha 1	S, FS
EHI_102270	heat shock protein 90, putative	S, FS
EHI_104390	actin binding protein	S, FS
EHI_109890	chitinase, putative	S, FS
EHI_123390	peroxiredoxin	S, FS
EHI_129520	hypothetical protein	S, FS
EHI_130700	enolase, putative	S, FS
EHI_136160	calreticulin, putative	S, FS
EHI_141850	hypothetical protein	S, FS
EHI_147570	GDP dissociation inhibitor (GDI)	S, FS
EHI_148320	40S ribosomal protein S3	S, FS
EHI_152170	chitinase Jessie 3, putative	S, FS
EHI_152980	hypothetical protein	S, FS
EHI_153300	hypothetical protein	S, FS
EHI_155520	glutamine synthetase, putative	S, FS
EHI_159150	actin	S, FS
EHI_166480	hypothetical protein	S, FS
EHI_167300	grainin 1	S, FS
EHI_175050	aspartyl-tRNA synthetase, putative	S, FS
EHI_178960	acetyl-CoA synthetase, putative	S, FS
EHI_182670	enhancer binding protein 2	S, FS
EHI_185410	26S protease regulatory subunit 8, putative	S, FS
EHI_188180	phosphoglycerate kinase, putative	S, FS
EHI_189490	elongation factor 2, putative	S, FS
EHI_193490	hypothetical protein	S, FS
EHI_196570	hypothetical protein	S, FS
EHI_198580	hypothetical protein	S, FS
EHI_199000	calponin homology domain protein, putative	S, FS
EHI_199590	heat shock protein 70, putative	S, FS
gi103484580	Clathrin heavy chain	S, FS
gi52352493	Sec61 alpha subunit	S, FS
