# Supplementary material for: Proteomic Analysis of the Cyst Stage of Entamoeba histolytica
Source: PLoS Negl Trop Dis. 2012 May 8;6(5):e1643. doi: 10.1371/journal.pntd.0001643 (PMC3348168; doi:10.1371/journal.pntd.0001643)
Supplement: Table S2 — Categories of proteins identified in sonication only and freeze-thaw-sonication, or both approaches for sample AM951. (XLSX) [file pntd.0001643.s005.xlsx]

## Sheet: Table S2
Protein category	Sonication only	Freeze-thaw- sonication	Both
actin / actin binding protein	4	0	3
Calcium binding / signal related	0	0	2
Cyst-wall specific	0	0	2
DNA repair	2	1	0
enzymatic function	7	8	11
GTPase / signal related	2	1	1
heat shock protein	1	0	2
miscellaneous	3	4	2
protein kinase	5	3	3
Protein-protein interaction	1	0	1
ribosomal protein	2	2	3
surface associated	1	0	0
transcription / translation related	0	1	5
Ubiquitin related	1	0	2
Unknown (hypothetical)	19	9	13
Vesicle coating (trafficking)	1	0	2
Total	49	29	52
