# Supplementary material for: Proteomic Analysis of the Cyst Stage of Entamoeba histolytica
Source: PLoS Negl Trop Dis. 2012 May 8;6(5):e1643. doi: 10.1371/journal.pntd.0001643 (PMC3348168; doi:10.1371/journal.pntd.0001643)
Supplement: Table S3 — All the E. histolytica proteins detected in 5 E. histolytica cyst samples (N = 417). (XLSX) [file pntd.0001643.s006.xlsx]

## Sheet: Table S3
E. histolytica Locus ID	MW (kDa)	Detected in sample: 1 = 8076; 2 = 4268; 3 = AM951; 4 = AM797; & 5 = CMS33-7132	Annotation	Transcriptome data*			E. dispar homolog		No. of spectrum counts in LC-MS/MS experiment						Protein category	Found in trophozoite protein DB (AmoebaDB)	Found in trophozoite EST DB (AmoebaDB)	TM domain	Predicted signal peptide
				p-value	fold change: cyst / troph	HM-1 expr	Locus ID	% identity	8076	4268	AM951	AM797	CMS33-7132	Total
10.m00319	33	4, 5	actin	0.272	1.12	127.75	EDI_251490	100	0	0	0	150	43	193	actin / actin binding protein	No	No	No	No
EHI_111050	45	4	actin-like protein, putative	0.526	1.114	32.5	EDI_053710	95	0	0	0	1	0	1	actin / actin binding protein	No	No	No	No
EHI_155450	58.5	2	chaperonin containing TCP-1 epsilon subunit, putative	0.0166	2.515	15.815	EDI_306160	99	0	1	0	0	0	1	actin / actin binding protein	No	No	No	No
EHI_105330	51.8	3	coronin, putative	0.158	-1.71527	0.5035	EDI_062850	80	0	0	1	0	0	1	actin / actin binding protein	No	Yes	No	No
EHI_080740	148	5	filopodin, putative	0.198	-1.71821	6.3805	EDI_145260	96	0	0	0	0	2	2	actin / actin binding protein	Yes	No	No	No
EHI_083590	48	4	coronin, putative	0.545	-1.29534	13.32	EDI_062850	93	0	0	0	8	0	8	actin / actin binding protein	Yes	No	No	No
EHI_090250	99	4	formin homology 2 (FH2) domain containing protein	0.484	1.952	0.9285	EDI_222570	96	0	0	0	1	0	1	actin / actin binding protein	Yes	No	No	No
EHI_094120	41	5	ARP2/3 complex 41 kDa subunit, putative	0.334	1.222	20.29	EHI_045000	99	0	0	0	0	1	1	actin / actin binding protein	Yes	Yes	No	No
EHI_104390	64.4	3, 4, 5	actin binding protein	0.581	-1.20048	42.2	EDI_146020	98	0	0	9	19	3	31	actin / actin binding protein	Yes	No	No	No
EHI_104560	41	4	cortexillin, putative	0.594	-1.25945	18.11	EDI_077810	97	0	0	0	2	0	2	actin / actin binding protein	Yes	No	No	No
EHI_104630	95	3, 4, 5	filamin 2	0.841	1.03	31.395	EDI_145990	95	0	0	1	8	1	10	actin / actin binding protein	Yes	No	No	No
EHI_107290	42	4, 5	actin, putative	NF	NF	NF	EDI_251490	99	0	0	0	22	20	42	actin / actin binding protein	Yes	Yes	No	No
EHI_159150	42	1, 2, 3, 4, 5	actin	0.272	1.12	127.75	EDI_251490	99	14	1	28	22	20	85	actin / actin binding protein	Yes	Yes	No	No
EHI_168340	16.2	1	actin-binding protein, cofilin/tropomyosin family	0.0184	-1.77305	63.175	EDI_252700	93	1	0	0	0	0	1	actin / actin binding protein	Yes	Yes	No	No
EHI_174910	21.8	3	ARP2 3 complex 21 kDa subunit, putative	0.000315	-3.44828	5.3225	EDI_078800	95	0	0	1	0	0	1	actin / actin binding protein	Yes	Yes	No	No
EHI_197480	16	4, 5	actophorin, putative	0.426	1.014	30.13	EDI_002830	99	0	0	0	1	2	3	actin / actin binding protein	Yes	No	No	No
EHI_199000	69.8	1, 2, 3, 4, 5	calponin homology domain protein, putative	0.61	-1.19617	17.51	EDI_033890	98	2	4	10	42	6	64	actin / actin binding protein	Yes	Yes	No	No
EHI_167010	51	4, 5	beta-tubulin, putative	0.0343	29.69	0.0491	EDI_299300	96	0	0	0	1	1	2	actin / actin binding protein	No	No	No	No
EHI_110180	246.6	2, 3, 4, 5	myosin heavy chain	0.153	-1.28041	40.945	EDI_175070	99	0	3	2	34	3	42	actin / actin binding protein	Yes	No	No	No
EHI_110810	119	4	unconventional myosin IB	0.544	-1.2285	20.105	EDI_340740	99	0	0	0	3	0	3	actin / actin binding protein	Yes	Yes	No	No
EHI_164430	53.9	1	grainin 2	0.0827	1.639	20.645	EDI_207850	89	1	0	0	0	0	1	Calcium binding / signal related	No	No	No	No
EHI_015290	30	4	C2 domain protein, putative	0.000136	91.49	0.05605	EDI_238990	67	0	0	0	3	0	3	Calcium binding / signal related	No	Yes	No	No
EHI_118130	42	4	C2 domain protein, putative	0.0001	537	0.04675	EDI_206770	82	0	0	0	2	0	2	Calcium binding / signal related	No	Yes	No	No
EHI_069320	21	4	C2 domain protein, putative	0.407	2.412	45.815	EDI_278250	95	0	0	0	1	0	1	Calcium binding / signal related	Yes	Yes	No	No
EHI_114220	271.5	1, 4, 5	C2 domain containing protein, putative	0.0001	3.665	1.1825	EDI_110860	94	1	0	0	1	1	3	Calcium binding / signal related	Yes	No	No	No
EHI_124390	301	4	C2 domain containing protein, putative	0.00477	238.2	0.06695	EDI_023820	94	0	0	0	1	0	1	Calcium binding / signal related	Yes	No	No	No
EHI_136160	45.1	3, 4, 5	calreticulin, putative	0.0836	-3.20513	46.33	EDI_202920	99	0	0	15	5	3	23	Calcium binding / signal related	Yes	Yes	No	Yes
EHI_151250	296.7	2	C2 domain containing protein, putative	0.778	-1.0846	1.248	EDI_009730	92	0	1	0	0	0	1	Calcium binding / signal related	Yes	No	No	No
EHI_167300	24.3	1, 2, 3, 4, 5	grainin 1	0.0401	-3.04878	67.3	EDI_060400	96	4	3	5	3	3	18	Calcium binding / signal related	Yes	Yes	No	Yes
EHI_167310	24.1	1, 4, 5	grainin 2	0.135	-3.64964	46.265	EDI_060410	95	8	0	0	4	2	14	Calcium binding / signal related	Yes	Yes	No	No
EHI_113570	96.5	2	chromosome-associated kinesin family protein	0.169	2.654	0.376	EDI_115560	95	0	2	0	0	0	2	chromosome segregation associated	No	No	No	No
EHI_131060	64.3	1	SMC (structural maintenance of chromosomes) protein, putative	0.239	-2.07469	0.6535	EDI_076200	87	1	0	0	0	0	1	chromosome segregation associated	No	No	No	No
EHI_125300	132	2	diaphanous protein; Chromosome segregation ATPases [Cell division and chromosome partitioning]	0.979	-1.00705	5.3075	EDI_115990	97	0	1	0	0	0	1	chromosome segregation associated	No	Yes	No	No
EHI_013060	179	4	chromosome segregation protein, putative	0.0577	12.02	0.04375	EDI_044540	86	0	0	0	1	0	1	chromosome segregation associated	Yes	No	Yes	Yes
EHI_072050	214.2	2	chromosome segregation protein SMC, putative	0.0308	-4.1841	0.225	EDI_048910	67	0	1	0	0	0	1	chromosome segregation associated	Yes	Yes	No	No
EHI_110530	58	4	chromosome segregation protein SMC, putative	NF	NF	NF	EDI_340750	63	0	0	0	1	0	1	chromosome segregation associated	Yes	No	No	No
EHI_140150	72.2	1	chromosome segregation protein SMC, putative	0.00843	-7.8125	0.4345	EDI_043480	82	1	0	0	0	0	1	chromosome segregation associated	Yes	No	No	No
EHI_028930	17.4	1	cyst wall-specific glycoprotein Jacob	0.0171	88.12	0.0676	EDI_136500	85	6	0	0	0	0	6	Cyst-wall specific	No	No	No	Yes
EHI_044840	110	4	chitin synthase 2	0.00156	4.915	0.449	EDI_246480	89	0	0	0	1	0	1	Cyst-wall specific	No	No	Yes	No
EHI_109890	57.3	1, 3, 4, 5	chitinase, putative	0.0001	87.37	0.2005	EDI_120190	82	10	0	15	23	4	52	Cyst-wall specific	No	No	No	Yes
EHI_152170	70	1, 3, 4, 5	chitinase Jessie 3, putative	0.0001	43.5	0.6675	EDI_038370	90	1	0	5	12	6	24	Cyst-wall specific	No	No	No	Yes
EHI_053200	65.4	3	DNA double-strand break repair Rad50 ATPase, putative	NF	NF	NF	EDI_157070	84	0	0	1	0	0	1	DNA repair	No	No	No	No
EHI_125910	68.8	2	DNA double-strand break repair protein, putative	0.798	-1.17647	0.0943	EDI_338400	92	0	1	0	0	0	1	DNA repair	No	No	No	No
EHI_126120	72.9	1, 2	DNA mismatch repair protein mutL	0.452	1.725	0.06175	EDI_012590	72	2	1	0	0	0	3	DNA repair	No	No	No	No
EHI_129890	47.1	3, 4	type A flavoprotein	0.0566	41.32	0.05005	EDI_002270	89	0	0	1	1	0	2	DNA repair	No	No	No	No
EHI_096710	46	4	type A flavoprotein	0.643	-1.23305	89.895	EDI_092690	93	0	0	0	1	0	1	DNA repair	Yes	No	No	No
EHI_103840	100.2	3	DNA repair protein RAD54, putative	0.094	2.327	1.281	EDI_116490	98	0	0	1	0	0	1	DNA repair	Yes	No	No	No
416.m00035	22.8	2	reverse transcriptase, putative	NF	NF	NF	None	N/A	0	1	0	0	0	1	enzymatic function	No	No	No	No
453.m00043	11	2	reverse transcriptase, putative	NF	NF	NF	None	N/A	0	1	0	0	0	1	enzymatic function	No	No	No	No
EHI_007330	64.4	1, 2, 3, 5	hexosaminidase alpha chain	0.62	1.191	23.94	EDI_146160	96	1	1	2	0	2	6	enzymatic function	No	No	No	Yes
EHI_010360	50	2	phosphatidylinositol-3,4,5-trisphosphate 3-phosphatase	0.558	1.059	0.807	EDI_255210	93	0	1	0	0	0	1	enzymatic function	No	No	No	No
EHI_047730	61	4	glucose-6-phosphate isomerase, putative	0.265	-1.72712	14.89	EDI_343710	96	0	0	0	1	0	1	enzymatic function	No	No	No	No
EHI_050570	34	5	cysteine proteinase, putative	0.00249	6.371	2.661	EDI_156850	92	0	0	0	0	2	2	enzymatic function	No	No	No	Yes
EHI_056650	59	5	Ser/Thr protein phosphatase, putative	0.0276	14.93	0.9905	EDI_228200	97	0	0	0	0	1	1	enzymatic function	No	No	No	No
EHI_067510	32.6	2	Ulp1 protease family protein	0.000944	6.976	0.5505	EDI_071650	94	0	1	0	0	0	1	enzymatic function	No	No	No	No
EHI_069210	70	5	AAA family ATPase, putative	0.625	-1.19474	1.889	EDI_278360	95	0	0	0	0	1	1	enzymatic function	No	No	No	No
EHI_072130	48.6	3	lipase, putative	0.465	-1.17647	0.1875	EDI_344740	94	0	0	1	0	0	1	enzymatic function	No	No	No	No
EHI_073570	48.4	1	histone acetyltransferase, putative	0.000729	-2.21239	0.605	EDI_083840	97	1	0	0	0	0	1	enzymatic function	No	No	No	No
EHI_092450	41	4	malate dehydrogenase, putative	0.208	1.472	21.59	EDI_165870	98	0	0	0	2	0	2	enzymatic function	No	No	No	No
EHI_097630	59	4	Phospholipase B, putative	0.923	-1.04167	19.805	EDI_032600	87	0	0	0	1	0	1	enzymatic function	No	No	No	Yes
EHI_099180	46.8	1, 2	lecithin:cholesterol acyltransferase, putative	0.321	1.724	0.6445	EDI_244000	91	1	3	0	0	0	4	enzymatic function	No	No	No	Yes
EHI_103530	43	4	DNA primase small subunit, putative	0.42	-1.27389	0.211	EDI_346130	92	0	0	0	1	0	1	enzymatic function	No	No	No	No
EHI_109940	82	4	mRNA capping enzyme, putative	0.122	-1.42857	0.2895	EDI_063070	95	0	0	0	1	0	1	enzymatic function	No	No	No	No
EHI_110170	190	4	ubiquitinyl hydrolase, putative	0.118	4.842	0.136	EDI_175060	84	0	0	0	1	0	1	enzymatic function	No	No	Yes	No
EHI_125660	48.8	2	acid sphingomyelinase-like phosphodiesterase, putative	0.0719	-1.20048	13.41	EDI_106600	98	0	1	0	0	0	1	enzymatic function	No	No	No	Yes
EHI_129810	70	5	Alpha amylase, putative	0.348	1.624	0.0653	EDI_002550	97	0	0	0	0	2	2	enzymatic function	No	No	No	Yes
EHI_135140	54.4	2	Methyltransferase TRM13, putative	0.357	1.527	2.7295	EDI_260090	84	0	1	0	0	0	1	enzymatic function	No	No	No	No
EHI_135220	113.2	1	phospholipid-transporting P-type ATPase, putative	0.0185	1.735	0.183	EDI_336740	92	1	0	0	0	0	1	enzymatic function	No	No	Yes	No
EHI_141040	104.1	1	ATPase, AAA family protein	0.807	-1.15473	0.6605	EDI_129550	98	1	0	0	0	0	1	enzymatic function	No	No	No	No
EHI_142080	39.6	3	glycosyltransferase, putative	6.37e-13	23.09	0.1425	EDI_338150	94	0	0	1	0	0	1	enzymatic function	No	No	No	Yes
EHI_147530	61.1	3	DNA primase large subunit, putative	0.546	-1.13636	0.88	EDI_063580	97	0	0	1	0	0	1	enzymatic function	No	No	No	No
EHI_148680	126.8	2, 3	Predicted permease, putative	0.512	1.297	0.543	EDI_333920	92	0	1	1	0	0	2	enzymatic function	No	No	Yes	Yes
EHI_155770	83.1	2	DNA polymerase III PolC, putative	0.584	-1.09051	0.586	EDI_317580	97	0	1	0	0	0	1	enzymatic function	No	No	No	No
EHI_164760	33.2	2	short chain dehydrogenase	0.264	-1.96078	0.841	EDI_028220	94	0	1	0	0	0	1	enzymatic function	No	No	Yes	Yes
EHI_174540	160	5	Tyrosyl-DNA phosphodiesterase, putative	0.525	1.606	0.0431	EDI_259130	59	0	0	0	0	1	1	enzymatic function	No	No	No	No
EHI_000440	55	4	UDP-glucose pyrophosphorylase, putative	0.0251	-1.51745	19.64	EDI_026840	95	0	0	0	1	0	1	enzymatic function	No	Yes	No	No
EHI_001780	25.7	1	Nucleoside/nucleotide kinase (NK) superfamily protein, putative	0.649	-1.10132	27.185	EDI_138600	99	1	0	0	0	0	1	enzymatic function	No	Yes	No	No
EHI_012980	122	4	dihydropyrimidine dehydrogenase, putative	0.0305	-4.97512	0.535	EDI_044620	99	0	0	0	2	0	2	enzymatic function	No	Yes	No	No
EHI_031960	49.3	1	SET domain containing protein	0.611	1.293	0.408	EDI_292770	91	1	0	0	0	0	1	enzymatic function	No	Yes	No	No
EHI_060860	33.5	1, 4, 5	D-3-phosphoglycerate dehydrogenase, putative	0.000575	-15.361	26.835	EDI_314570	90	1	0	0	2	1	4	enzymatic function	No	Yes	No	No
EHI_093820	48	2, 3	RNA polymerase I associated factor, putative	0.716	1.303	1.2425	EDI_340990	90	0	1	2	0	0	3	enzymatic function	No	Yes	No	No
EHI_094100	43	4, 5	galactokinase, putative	0.0501	2.318	17.78	EDI_145950	95	0	0	0	4	1	5	enzymatic function	No	Yes	No	No
EHI_124430	111	4	Zn-dependent peptidase, putative	0.196	1.649	5.433	EDI_023860	87	0	0	0	1	0	1	enzymatic function	No	Yes	No	No
EHI_161970	122.5	3	leucyl-tRNA synthetase, putative	0.173	-1.69205	9.4175	EDI_060790	99	0	0	1	0	0	1	enzymatic function	No	Yes	No	No
EHI_185280	66.7	3	phosphoglucomutase phosphomannomutase family protein	0.692	-1.41443	6.1665	EDI_320690	97	0	0	1	0	0	1	enzymatic function	No	Yes	No	No
EHI_199110	23.6	2, 3	lysozyme, putative	0.0165	5.648	4.5695	EDI_092550	61	0	1	1	0	0	2	enzymatic function	No	Yes	No	Yes
EHI_004600	60.3	1, 3, 4	hydroxylamine reductase, putative	0.0651	-1.49701	14.51	EDI_144620	97	1	0	3	2	0	6	enzymatic function	Yes	No	No	No
EHI_008200	35	3, 4, 5	glyceraldehyde-3-phosphate dehydrogenase, putative	0.571	-1.16009	112.3	EDI_060430	96	0	0	1	11	7	19	enzymatic function	Yes	Yes	No	No
EHI_024420	51	4	D-hydantoinase, putative	0.074	-1.52207	4.1685	EDI_341970	97	0	0	0	1	0	1	enzymatic function	Yes	No	No	No
EHI_042170	56.9	3	aminoacyl-histidine dipeptidase, putative	0.188	-1.72117	33.515	EDI_165910	97	0	0	1	0	0	1	enzymatic function	Yes	Yes	No	No
EHI_044370	78	4	Glucoamylase and related glycosyl hydrolase, PUTATIVE	6.54e-10	4.378	28.105	EDI_028540	96	0	0	0	2	0	2	enzymatic function	Yes	No	No	Yes
EHI_044970	53	4, 5	malic enzyme	0.733	-1.15741	38.07	EDI_245690	99	0	0	0	1	2	3	enzymatic function	Yes	Yes	No	No
EHI_047810	83	4	lysyl-tRNA synthetase, putative	0.0628	1.305	8.88	EDI_343790	95	0	0	0	1	0	1	enzymatic function	Yes	No	No	No
EHI_051060	127	3, 4, 5	pyruvate:ferredoxin oxidoreductase	0.94	-1.01833	109.25	EDI_233890	94	0	0	6	5	7	18	enzymatic function	Yes	Yes	No	No
EHI_059830	99.3	1, 3	cysteine protease binding protein family 8, putative	0.995	1.003	24.315	EDI_187720	95	1	0	2	0	0	3	enzymatic function	Yes	No	Yes	Yes
EHI_061980	26.3	3	peroxiredoxin	0.154	-1.10742	207.15	EDI_044980	91	0	0	18	0	0	18	enzymatic function	Yes	Yes	No	No
EHI_072020	15.5	1	Rhodanese Homology Domain (RHOD)	0.0523	-2.94985	0.6565	EDI_344630	91	1	0	0	0	0	1	enzymatic function	Yes	No	No	No
EHI_075150	82.8	1, 4	glutamate dehydrogenase, putative	0.0001	42.87	0.4815	EDI_116960	93	1	0	0	12	0	13	enzymatic function	Yes	No	No	Yes
EHI_076870	34	4	steroid 5-alpha reductase, putative ,	0.141	-1.97239	38.44	EDI_292090	92	0	0	0	1	0	1	enzymatic function	Yes	Yes	Yes	No
EHI_087570	13.4	3, 4, 5	endoribonuclease L-PSP, putative	0.799	-2.10084	37.315	EDI_180210	99	0	0	4	1	1	6	enzymatic function	Yes	Yes	No	Yes
EHI_098570	36.2	1, 2, 3, 4, 5	fructose-1,6-bisphosphate aldolase, putative	0.241	-1.48368	123.5	EDI_201730	99	4	7	5	9	6	31	enzymatic function	Yes	Yes	No	No
EHI_102270	81	3, 4, 5	heat shock protein 90, putative	0.0951	-2.36967	27.775	None	N/A	0	0	10	1	1	12	enzymatic function	Yes	No	No	No
EHI_105060	40	1, 4	geranylgeranyl pyrophosphate synthase, putative	2.22e-07	-10.1317	54.955	EDI_237520	90	1	0	0	3	0	4	enzymatic function	Yes	No	No	No
EHI_106090	68	4	starch branching enzyme, putative	0.163	-1.65563	6.0915	EDI_171020	97	0	0	0	2	0	2	enzymatic function	Yes	No	No	No
EHI_114010	26	4, 5	peroxiredoxin	NF	NF	NF	EDI_044980	91	0	0	0	1	1	2	enzymatic function	Yes	Yes	No	No
EHI_123390	26.7	3	peroxiredoxin	NF	NF	NF	EDI_017900	98	0	0	17	0	0	17	enzymatic function	Yes	Yes	No	No
EHI_126880	46	1	methionine aminopeptidase, putative	0.215	1.751	47.865	EDI_335240	98	1	0	0	0	0	1	enzymatic function	Yes	No	No	No
EHI_126920	52	4, 5	asparaginyl-tRNA synthetase, putative	0.303	-1.71233	34.955	EDI_190470	99	0	0	0	1	1	2	enzymatic function	Yes	Yes	No	No
EHI_127030	64	4	C1 Peptidase family, putative	0.366	1.383	15.46	EDI_190570	97	0	0	0	2	0	2	enzymatic function	Yes	No	No	No
EHI_130700	47.3	1, 3, 4	enolase, putative	0.995	-1.001	64.25	EDI_011730	99	1	0	13	2	0	16	enzymatic function	Yes	Yes	No	No
EHI_130960	26.3	2	purine nucleoside phosphorylase, putative	0.115	-3.50877	39.8	EDI_202830	99	0	1	0	0	0	1	enzymatic function	Yes	Yes	No	No
EHI_136150	53	4, 5	adenylyl cyclase-associated protein, putative	0.0117	-2.12766	23.99	EDI_202930	95	0	0	0	5	1	6	enzymatic function	Yes	Yes	No	No
EHI_136440	77	4	dipeptidyl-peptidase, putative	0.0258	-3.46021	27.74	EDI_096060	95	0	0	0	1	0	1	enzymatic function	Yes	Yes	No	Yes
EHI_145840	26.3	1, 4, 5	peroxiredoxin, putative	0.154	-1.10742	207.15	EDI_044980	90	17	0	0	66	14	97	enzymatic function	Yes	Yes	No	No
EHI_145970	166.1	3	Metallo-beta-lactamase, putative	0.647	-1.7762	0.524	None	N/A	0	0	1	0	0	1	enzymatic function	Yes	No	No	No
EHI_148560	103	5	4-alpha-glucanotransferase, putative	0.138	1.745	24.945	EDI_196330	98	0	0	0	0	1	1	enzymatic function	Yes	Yes	No	No
EHI_152130	33	4	NAD dependent pimerase/dehydratase	0.029	30.91	0.068	EDI_038410	98	0	0	0	1	0	1	enzymatic function	Yes	No	No	No
EHI_155520	81.8	3	glutamine synthetase, putative	0.0222	5.331	2.161	EDI_306230	97	0	0	3	0	0	3	enzymatic function	Yes	No	No	No
EHI_155570	63	4	glutamyl-tRNA synthetase, putative	0.486	-1.52905	12.145	EDI_306280	99	0	0	0	4	0	4	enzymatic function	Yes	No	No	No
EHI_159160	22.1	3, 4, 5	superoxide dismutase [Fe]	0.0307	-9.43396	75.69	EDI_325550	99	0	0	1	2	2	5	enzymatic function	Yes	No	No	No
EHI_160450	82.4	1, 2	DNA polymerase III PolC, putative	0.0028	22.68	0.04	EDI_102430	86	1	1	0	0	0	2	enzymatic function	Yes	No	Yes	Yes
EHI_160940	97	4, 5	aldehyde-alcohol dehydrogenase 2, putative	0.0911	-2.90698	105.95	EDI_342050	98	0	0	0	1	1	2	enzymatic function	Yes	Yes	No	No
EHI_169700	80.2	3	cysteinyl-tRNA synthetase, putative	0.199	-3.08642	4.5035	EDI_201870	96	0	0	1	0	0	1	enzymatic function	Yes	Yes	No	No
EHI_175050	62.6	1, 3, 4, 5	aspartyl-tRNA synthetase, putative	0.2	1.653	66.48	EDI_139190	98	1	0	2	1	2	6	enzymatic function	Yes	Yes	No	No
EHI_175400	108.3	1	Rhodanese Homology Domain (RHOD) containing protein, putative	0.31	2.036	1.157	EDI_213680	93	1	0	0	0	0	1	enzymatic function	Yes	No	No	No
EHI_178960	77.5	3, 4	acetyl-CoA synthetase, putative	0.403	-1.18343	132.95	EDI_135220	99	0	0	3	2	0	5	enzymatic function	Yes	Yes	No	No
EHI_182720	76	4	dipeptidyl-peptidase, putative	0.69	-1.17233	11.66	EDI_251670	92	0	0	0	1	0	1	enzymatic function	Yes	No	No	Yes
EHI_012280	107	5	GTP-binding protein, putative	0.147	1.732	12.915	EDI_213660	92	0	0	0	0	1	1	GTPase / signal related	Yes	Yes	Yes	No
EHI_035800	90	4	Ras GTPase activating protein, putative	0.071	-1.9685	6.0885	EDI_111800	99	0	0	0	2	0	2	GTPase / signal related	Yes	Yes	No	No
EHI_036880	29	5	Rho GTPase activating protein, putative	0.0635	6.326	0.11095	EDI_174550	94	0	0	0	0	1	1	GTPase / signal related	No	No	No	No
EHI_038630	52.1	2, 3, 4, 5	TBC domain containing protein, putative	0.319	1.718	0.0558	EDI_259490	91	0	3	2	2	1	8	GTPase / signal related	No	No	No	No
EHI_070730	21.6	2	EhRacC (Amoebic Rho2)	0.4	1.141	6.887	EDI_002630	60	0	2	0	0	0	2	GTPase / signal related	Yes	Yes	No	No
EHI_075040	16	4	Sar family GTPase	0.211	-1.51057	66.06	EDI_117080	98	0	0	0	2	0	2	GTPase / signal related	Yes	No	No	Yes
EHI_082550	26.2	2	EhRabK3	0.0152	-1.18906	5.657	EDI_186660	98	0	1	0	0	0	1	GTPase / signal related	No	Yes	No	Yes
EHI_086140	142.8	3	GTPase-activating protein (GAP)	0.145	2.638	0.5235	EDI_249280	88	0	0	1	0	0	1	GTPase / signal related	No	No	No	No
EHI_092730	20	5	Arf family GTPase	0.114	-1.75131	2.4045	EDI_319670	98	0	0	0	0	1	1	GTPase / signal related	No	No	No	Yes
EHI_094140	59.4	2	Rab GTPase activating protein, putative	0.196	2.943	0.481	EDI_145820	91	0	2	0	0	0	2	GTPase / signal related	No	No	No	No
EHI_114370	58	5	RhoGAP domain containing protein	0.000523	4.667	0.07295	EDI_201660	90	0	0	0	0	1	1	GTPase / signal related	No	No	No	No
EHI_117610	58.7	1	Rho GTPase activating protein, putative	0.373	-1.25945	0.3275	EDI_029530	83	1	0	0	0	0	1	GTPase / signal related	No	Yes	No	No
EHI_129750	22	4	EhRacG	0.13	-2.57732	15.36	EDI_002630	99	0	0	0	1	0	1	GTPase / signal related	Yes	Yes	No	No
EHI_146930	108	4	Ras GTPase activating protein, putative	0.402	1.248	0.4335	EDI_349930	89	0	0	0	1	0	1	GTPase / signal related	Yes	No	No	No
EHI_147570	20	3	GDP dissociation inhibitor (GDI)	0.118	-3.02115	59.9	EDI_063620	100	0	0	3	0	0	3	GTPase / signal related	Yes	No	No	No
EHI_148500	57.6	1	Ras guanine nucleotide exchange factor, putative	0.225	-1.51515	3.8965	EDI_196270	99	1	0	0	0	0	1	GTPase / signal related	No	No	No	No
EHI_149900	73	3	Rab GTPase activating protein, putative	0.0115	1.564	0.3905	EDI_321460	94	0	0	1	0	0	1	GTPase / signal related	No	No	No	No
EHI_153460	23.2	1	Rho family GTPase (unclassified)	0.00447	-1.61031	1.1575	EDI_093650	94	1	0	0	0	0	1	GTPase / signal related	No	No	No	No
EHI_167170	111.3	1	Ras guanine nucleotide exchange factor, putative	0.152	-2.34742	1.6525	EDI_240690	92	1	0	0	0	0	1	GTPase / signal related	No	Yes	No	No
EHI_181530	94.3	2	GTPase-activating protein, putative	0.0642	-3.25733	0.898	EDI_174170	92	0	1	0	0	0	1	GTPase / signal related	Yes	No	No	No
EHI_182030	21.8	2	EhRabF2	0.128	-1.70358	1.959	EDI_154730	48	0	1	0	0	0	1	GTPase / signal related	No	No	No	No
EHI_187090	21.1	1	EhRab7G	0.524	-1.36426	4.2075	EDI_016400	97	1	0	0	0	0	1	GTPase / signal related	Yes	No	No	No
EHI_017350	42	5	heat shock protein 101, putative	0.665	1.293	22.335	EDI_344750	91	0	0	0	0	1	1	heat shock protein	No	No	No	No
EHI_052860	71.5	3, 4, 5	heat shock protein 70, putative	0.617	-1.002	80.795	EDI_315850	99	0	0	2	12	2	16	heat shock protein	Yes	Yes	No	No
EHI_065320	72.2	3	heat shock protein 70, putative	0.703	-1.12867	5.009	EDI_244260	83	0	0	1	0	0	1	heat shock protein	Yes	No	No	No
EHI_163480	81	4	90 kDa heat shock protein, putative	0.0682	-2.38663	37.175	EDI_221760	94	0	0	0	1	0	1	heat shock protein	Yes	Yes	No	Yes
EHI_199590	73.5	3, 4, 5	heat shock protein 70, putative	0.0489	-2.28833	66.135	EDI_027670	98	0	0	6	4	1	11	heat shock protein	Yes	Yes	No	Yes
EHI_004750	54	4	signal recognition particle protein SRP54, putative	NF	NF	NF	EDI_248350	99	0	0	0	1	0	1	miscellaneous	No	No	No	No
EHI_066720	242	4	MAEBL, putative	0.39	-1.63399	2.271	EDI_281920	54	0	0	0	1	0	1	miscellaneous	No	No	No	No
EHI_070800	75	5	IPT/TIG domain containing protein, putative	0.65	-1.10865	0.6625	EDI_085400	90	0	0	0	0	1	1	miscellaneous	No	No	No	No
EHI_082080	102	5	WD repeat protein	0.00653	-1.64204	3.1765	EDI_305870	95	0	0	0	0	1	1	miscellaneous	No	No	No	No
EHI_118620	181	4, 5	microtubule organization protein, putative	0.151	4.129	1.027	EDI_229050	90	0	0	0	1	1	2	miscellaneous	No	No	No	No
EHI_137840	46.1	3	WD repeat protein	0.0268	3.269	0.10295	EDI_323280	95	0	0	1	0	0	1	miscellaneous	No	No	No	No
EHI_166420	51	5	cyclin, putative	0.183	2.314	0.7715	EDI_272880	81	0	0	0	0	1	1	miscellaneous	No	No	No	No
EHI_200840	54	4	Signal recognition particle receptor alpha subunit, putative	0.323	1.475	8.817	EDI_315500	97	0	0	0	1	0	1	miscellaneous	No	No	No	No
EHI_006550	83	4	RNA binding related	0.939	-1.13507	1.95	EDI_169340	94	0	0	0	1	0	1	miscellaneous	No	Yes	No	No
EHI_025440	27	4	RNA recognition motif domain containing protein	0.217	1.72	0.278	EDI_070430	91	0	0	0	2	0	2	miscellaneous	No	Yes	No	No
EHI_045170	206	5	U5 snRNP-specific 200kd protein, putative	0.9	1.245	0.05945	EDI_245240	96	0	0	0	0	1	1	miscellaneous	Yes	No	No	No
EHI_049620	39	4	Fe-S cluster assembly protein NifU, putative	0.497	1.337	84.585	EDI_167560	100	0	0	0	1	0	1	miscellaneous	Yes	Yes	No	No
EHI_063010	122	4	cell division control protein 7, putative	0.0573	3.503	0.2415	EDI_345270	94	0	0	0	1	0	1	miscellaneous	Yes	No	No	No
EHI_101230	64	4	Truncated P-glycoprotein 6, putative	0.167	-1.31234	24.39	EDI_202600	99	0	0	0	1	0	1	miscellaneous	Yes	No	Yes	No
EHI_177990	99	4	Ribosome biogenesis protein BMS1, putative	0.334	1.478	9.5955	EDI_044180	99	0	0	0	1	0	1	miscellaneous	Yes	No	No	No
EHI_183900	57	5	snoRNA binding protein, putative	0.365	-1.31234	30.175	EDI_064230	96	0	0	0	0	1	1	miscellaneous	Yes	No	No	No
EHI_185270	273.2	3, 4	Dedicator of cytokinesis domain containing protein	0.000825	13.82	0.178	EDI_320480	94	0	0	1	1	0	2	miscellaneous	Yes	No	No	No
EHI_196410	112	4	Ribosome biogenesis protein BMS1, putative	0.17	-1.72712	5.9175	EDI_240040	97	0	0	0	1	0	1	miscellaneous	Yes	No	No	No
EHI_010530	50	4	tubulin alpha chain, putative	NF	NF	NF	EDI_255160	98	0	0	0	1	0	1	miscellaneous (cytoskeleton related)	Yes	Yes	No	No
EHI_130710	83	1	myb-like DNA-binding domain containing protein	0.0534	2.709	0.1775	EDI_011720	92	1	0	0	0	0	1	miscellaneous (DNA binding protein)	No	No	No	No
EHI_151260	45	4	DnaJ family protein	0.253	-1.61031	6.453	EDI_112430	83	0	0	0	1	0	1	miscellaneous (protein folding, protein transport, and the cell's response to stress)	No	No	No	No
EHI_117920	47	4	pleckstrin homology domain protein	0.93	1.024	23.265	EDI_206970	99	0	0	0	1	0	1	miscellaneous (Signal / cytoskeleton related)	No	Yes	No	No
EHI_142960	60.6	1	MIG-14_Wnt-bd	0.00317	-9.17431	2.3385	EDI_057980	89	1	0	0	0	0	1	miscellaneous (Signal related)	No	No	Yes	No
EHI_030880	35.4	3	cyclin, putative	0.944	-1.0395	0.8885	EDI_279800	96	0	0	1	0	0	1	Miscellaneous proteins	No	No	No	No
EHI_066740	48.2	1	Rare lipoprotein A (RlpA)-like double-psi beta-barrel containing protein, putative	0.00381	5.659	0.6175	EDI_281940	93	1	0	0	0	0	1	Miscellaneous proteins	No	No	No	Yes
EHI_148110	76	1	Telomere length regulation protein, putative	0.0001	2.353	0.3965	EDI_335080	90	1	0	0	0	0	1	miscellaneous proteins	No	No	No	No
EHI_158620	47.6	1	Opioid growth factor receptor (OGFr) conserved region	0.326	1.674	0.2605	EDI_036800	69	1	0	0	0	0	1	Miscellaneous proteins	No	No	No	No
EHI_012330	290.6	3	serine-threonine-isoleucine rich protein	0.455	-1.84162	27.59	EDI_213610	78	0	0	1	0	0	1	Miscellaneous proteins	Yes	No	Yes	No
EHI_050340	39.8	1	Nitrogen permease regulator 2, putative	0.000149	-2.12766	0.835	EDI_245670	96	1	0	0	0	0	1	Miscellaneous proteins	Yes	No	No	No
EHI_073470	19.9	3	ADP-ribosylation factor, putative	0.0102	-5.18135	66.66	EDI_275790	100	0	0	1	0	0	1	Miscellaneous proteins	Yes	No	No	No
EHI_081430	18.4	3	adenylylcyclase-associated protein	NF	NF	NF	EDI_202930	100	0	0	5	0	0	5	Miscellaneous proteins	Yes	No	No	No
EHI_083620	185	4, 5	MAEBL, putative	0.0366	1.454	35.1	EDI_062870	96	0	0	0	5	1	6	Miscellaneous proteins	Yes	No	No	No
EHI_164410	110.4	3	exportin, putative	0.654	1.129	0.182	EDI_085690	90	0	0	1	0	0	1	Miscellaneous proteins	Yes	No	No	No
EHI_183510	185.9	1, 2, 3	nuclear pore protein, putative	0.752	1.186	3.236	EDI_334560	96	1	2	1	0	0	4	Miscellaneous proteins	Yes	No	Yes	Yes
EHI_034210	155.9	2	Protein kinase, putative	0.045	-1.5949	0.04685	EDI_142140	72	0	2	0	0	0	2	protein kinase	No	No	Yes	Yes
EHI_039050	37.3	1	Protein tyrosine phosphatase, putative	0.852	1.061	0.276	EDI_070980	90	2	0	0	0	0	2	protein kinase	No	No	Yes	Yes
EHI_059040	154.4	3	protein kinase domain containing protein	NF	NF	NF	EDI_142140	70	0	0	1	0	0	1	protein kinase	No	No	Yes	Yes
EHI_068350	89.5	3	protein kinase, putative	0.0173	2.008	0.125	EDI_047040	93	0	0	1	0	0	1	protein kinase	No	No	Yes	No
EHI_068600	17	4, 5	protein kinase, putative	0.00102	-2.42131	2.57	EDI_066690	97	0	0	0	1	3	4	protein kinase	No	No	No	No
EHI_104670	45	5	protein kinase, putative	0.347	-1.50602	1.6455	EDI_343330	97	0	0	0	0	1	1	protein kinase	No	No	No	No
EHI_110650	196	5	protein kinase, putative	0.13	6.76	0.0508	EDI_340570	91	0	0	0	0	1	1	protein kinase	No	No	Yes	Yes
EHI_114130	125.6	3	protein kinase domain containing protein	0.355	1.663	0.08045	EDI_038360	91	0	0	1	0	0	1	protein kinase	No	No	Yes	Yes
EHI_117680	203	3	protein kinase, putative	0.117	2.891	0.04515	EDI_160040	34	0	0	2	0	0	2	protein kinase	No	No	Yes	Yes
EHI_118810	122.2	2	protein kinase, putative	0.116	-3.08642	7.335	EDI_228480	90	0	1	0	0	0	1	protein kinase	No	No	Yes	Yes
EHI_134750	126.7	1	protein tyrosine kinase domain-containing protein	0.2	-1.52439	3.002	EDI_339130	91	1	0	0	0	0	1	protein kinase	No	No	Yes	Yes
EHI_140330	85.1	3	protein kinase, putative	0.769	-1.08225	2.062	EDI_043300	95	0	0	1	0	0	1	protein kinase	No	No	No	No
EHI_152390	63	5	protein kinase, putative	0.674	-1.01317	0.06335	EDI_179410	93	0	0	0	0	1	1	protein kinase	No	No	No	No
EHI_164910	49	5	protein kinase, putative	0.000997	8.908	1.7815	EDI_282610	94	0	0	0	0	1	1	protein kinase	No	No	No	No
EHI_171310	67	5	protein kinase, putative	0.0628	3.32	0.0915	EDI_308360	96	0	0	0	0	1	1	protein kinase	No	No	Yes	Yes
EHI_175920	125	4	protein kinase, putative	NF	NF	NF	EDI_280160	74	0	0	0	1	0	1	protein kinase	No	No	Yes	No
EHI_187170	110	5	Protein kinase C domain (Cysteine-rich domain) containing protein	0.000135	13.31	0.1475	EDI_016320	88	0	0	0	0	1	1	protein kinase	No	No	No	No
EHI_192540	47.8	1	protein kinase, putative	0.0302	2.253	3.0195	EDI_194660	99	1	0	0	0	0	1	protein kinase	No	No	No	No
EHI_197200	196	4	protein kinase domain containing protein	0.292	2.131	0.539	EDI_045860	95	0	0	0	1	0	1	protein kinase	No	No	No	No
EHI_023050	133	4	protein kinase, putative	0.905	-1.14025	0.0738	EDI_022240	93	0	0	0	1	0	1	protein kinase	No	Yes	Yes	Yes
EHI_009530	97.9	1, 2, 3, 4, 5	pyruvate phosphate dikinase	0.276	1.149	101.455	EDI_245170	99	2	1	16	4	1	24	protein kinase	Yes	Yes	No	No
EHI_050820	201	2, 3	protein kinase, putative	0.00162	2.721	0.9035	EDI_058780	91	0	1	7	0	0	8	protein kinase	Yes	No	Yes	Yes
EHI_064490	217.7	3	protein kinase, putative	0.0001	5.361	0.4205	EDI_336380	81	0	0	1	0	0	1	protein kinase	Yes	No	Yes	Yes
EHI_065240	218.9	1	receptor protein kinase, putative	0.104	5.011	0.459	EDI_078810	43	1	0	0	0	0	1	protein kinase	Yes	No	Yes	Yes
EHI_092260	83.9	1	tyrosine kinase, putative	0.0242	40.5	0.1275	EDI_153990	94	2	0	0	0	0	2	protein kinase	Yes	No	Yes	No
EHI_107230	227	5	protein kinase, putative	0.943	1.026	1.2065	EDI_125550	93	0	0	0	0	1	1	protein kinase	Yes	No	No	No
EHI_140320	83.1	3	protein kinase, putative	0.0583	1.747	9.004	EDI_043310	96	0	0	1	0	0	1	protein kinase	Yes	No	No	No
EHI_180150	135.1	3	protein kinase, putative	0.298	1.791	0.04775	EDI_243140	92	0	0	1	0	0	1	protein kinase	Yes	No	Yes	Yes
EHI_188180	44.9	3, 4, 5	phosphoglycerate kinase, putative	0.0648	1.485	85.32	EDI_158700	99	0	0	2	2	2	6	protein kinase	Yes	Yes	No	No
gi52352493	51.9	3	Sec61 alpha subunit	NF	NF	NF	EDI_302930	98	0	0	2	0	0	2	Protein translocation across the ER membrane	No	No	No	No
EHI_048270	196.2	1, 5	Sec7 domain protein	0.192	-1.18203	2.843	EDI_024320	94	1	0	0	0	1	2	Protein translocation across the ER membrane	Yes	No	No	No
EHI_164500	49	4	Sec61 alpha subunit, putative	0.474	-1.28205	58.645	EDI_104420	99	0	0	0	2	0	2	Protein translocation across the ER membrane	Yes	Yes	Yes	No
EHI_085830	76	5	Sec1 family domain containing protein	0.708	-1.11483	0.4865	EDI_219570	97	0	0	0	0	1	1	Protein transport	No	No	No	No
EHI_155350	19.3	1	Transport protein particle (TRAPP) component protein, putative	0.055	-3.27869	0.2395	EDI_306060	91	1	0	0	0	0	1	Protein transport	No	No	No	No
EHI_045490	74.7	1	SP-RING zinc finger domain containing protein	0.481	-1.30719	1.0085	EDI_049490	84	1	0	0	0	0	1	protein-protein interaction	No	No	No	No
EHI_067580	21.1	2	zinc finger protein, putative	0.0164	-2.80112	1.2725	EDI_071580	99	0	1	0	0	0	1	Protein-protein interaction	No	No	No	No
EHI_105850	74.7	1	ankyrin repeat protein, putative	0.5	1.117	0.0444	EDI_111450	88	1	0	0	0	0	1	Protein-protein interaction	No	No	No	No
EHI_139340	31	4	ankyrin repeat protein, putative	0.0105	33.52	0.0758	EDI_284000	92	0	0	0	1	0	1	Protein-protein interaction	No	No	No	No
EHI_141950	143.5	1	Putative zinc finger in N-recognin (UBR box)	0.87	1.041	0.2735	EDI_338280	85	1	0	0	0	0	1	Protein-protein interaction	No	No	No	No
EHI_122710	79.3	2	TPR repeat protein	0.248	1.682	2.7525	EDI_154490	93	0	1	0	0	0	1	Protein-protein interaction	No	Yes	No	No
EHI_006810	27.5	1, 3, 4, 5	14-3-3 protein 3	0.442	-1.30378	24.695	EDI_070510	87	1	0	4	2	1	8	Protein-protein interaction	Yes	Yes	No	No
EHI_025360	27.3	1, 4	14-3-3 protein 1	0.0758	-2.00401	38.985	EDI_070510	99	1	0	0	1	0	2	Protein-protein interaction	Yes	Yes	No	No
EHI_076850	14.8	3	leucine rich repeat protein	0.115	-1.15607	0.10315	EDI_349150	88	0	0	1	0	0	1	Protein-protein interaction	Yes	No	No	No
EHI_092360	327.9	1, 4	Zinc finger domain containing protein	0.0132	-1.36612	0.04355	EDI_280110	91	1	0	0	1	0	2	Protein-protein interaction	Yes	No	No	No
EHI_126110	23	4, 5	40S ribosomal protein S5, putative	NF	NF	NF	EDI_012580	99	0	0	0	2	1	3	ribosomal protein	No	No	No	No
EHI_035600	20	4	60S ribosomal protein L18a, putative	NF	NF	NF	EDI_004570	99	0	0	0	1	0	1	ribosomal protein	No	Yes	No	No
EHI_135790	23.9	3	60S ribosomal protein L10a, putative	0.725	-5.20833	136.75	EDI_129290	99	0	0	1	0	0	1	ribosomal protein	No	Yes	No	No
EHI_003940	36.8	3	40S ribosomal protein S4	0.567	-1.0395	117.25	EDI_217840	99	0	0	1	0	0	1	ribosomal protein	Yes	Yes	No	No
EHI_020280	27.7	3, 4	40S ribosomal protein S2, putative	0.421	1.099	143.8	EDI_070740	99	0	0	2	2	0	4	ribosomal protein	Yes	Yes	No	No
EHI_040800	24	4	60S ribosomal protein L15, putative	0.0398	-1.64474	174.9	EDI_059940	99	0	0	0	2	0	2	ribosomal protein	Yes	Yes	No	No
EHI_050280	29	4	40S ribosomal protein S3a, putative	NF	NF	NF	EDI_169590	98	0	0	0	1	0	1	ribosomal protein	Yes	Yes	No	No
EHI_068660	32.4	3	60S ribosomal protein L5, putative	0.00115	1.647	107.95	EDI_059370	100	0	0	3	0	0	3	ribosomal protein	Yes	Yes	No	No
EHI_086120	16.3	3	40S ribosomal protein S18, putative	0.0945	-2.57732	63.77	EDI_249300	100	0	0	2	0	0	2	ribosomal protein	Yes	No	No	No
EHI_098780	24	4	60S ribosomal protein L10, putative	0.158	-1.10497	103.94	EDI_318630	100	0	0	0	2	0	2	ribosomal protein	Yes	Yes	No	No
EHI_099730	23.1	3	60S ribosomal protein L13, putative	0.309	-1.3947	154.05	EDI_100630	99	0	0	1	0	0	1	ribosomal protein	Yes	Yes	No	No
EHI_130260	29	4, 5	40S ribosomal protein SA, putative	NF	NF	NF	EDI_202780	99	0	0	0	1	1	2	ribosomal protein	Yes	No	No	No
EHI_146560	14	4	40S ribosomal protein S24, putative	0.487	1.076	42.92	EDI_171760	100	0	0	0	1	0	1	ribosomal protein	Yes	Yes	No	No
EHI_148320	26.9	3, 4, 5	40S ribosomal protein S3	0.723	1.02	140.05	EDI_195710	99	0	0	2	1	1	4	ribosomal protein	Yes	Yes	No	No
EHI_160990	18	4	40S ribosomal protein S16, putative	0.000137	-22.0264	18.335	EDI_008400	99	0	0	0	2	0	2	ribosomal protein	Yes	Yes	No	No
EHI_047820	35.3	2	BspA-like leucine rich repeat protein, putative	0.267	1.778	0.04645	EDI_238280	63	0	3	0	0	0	3	surface associated	No	No	No	No
EHI_094080	96.6	1	BspA-like leucine rich repeat protein, putative	0.136	1.264	0.07375	EDI_145970	89	1	0	0	0	0	1	surface associated	No	No	Yes	Yes
EHI_110830	54.2	2	Legume lectin domain containing protein	0.403	-1.22549	1.1345	EDI_334460	94	0	1	0	0	0	1	surface associated	No	No	No	No
EHI_167290	96.2	2	BspA-like leucine rich repeat protein, putative	0.0605	-2.2779	0.745	EDI_060390	97	0	1	0	0	0	1	surface associated	No	No	No	No
EHI_181220	78	5	adhesin 112 (EhADH112)	0.000124	1.758	4.791	EDI_099300	93	0	0	0	0	3	3	surface associated	No	Yes	No	No
EHI_012270	144	4, 5	Gal/GalNAc lectin heavy subunit	NF	NF	NF	EDI_213670	88	0	0	0	2	3	5	surface associated	Yes	No	Yes	Yes
EHI_051080	114.5	2	BspA-like leucine rich repeat protein, putative	0.111	1.549	0.5795	EDI_233880	86	0	1	0	0	0	1	surface associated	Yes	No	No	No
EHI_065330	120.4	2, 3	Gal/GalNAc lectin subunit Igl2	0.00718	-5.10204	79.955	EDI_276450	79	0	1	1	0	0	2	surface associated	Yes	No	No	Yes
EHI_105210	37.8	2	BAR domain (membrane ass) containing protein	0.0982	-4.44444	59.815	EDI_130790	91	0	1	0	0	0	1	surface associated	Yes	Yes	No	No
EHI_133900	145.3	1	Truncated, galactose-specific adhesin 170kD subunit	0.144	-2.11864	78.295	EDI_213670	87	1	0	0	0	0	1	surface associated	Yes	Yes	Yes	Yes
EHI_151330	125	4	BspA-related protein, putative	0.133	1.021	0.1975	EDI_112600	91	0	0	0	1	0	1	surface associated	Yes	No	No	No
EHI_197410	42.3	2	cation diffusion facilitator family protein, putative	2.13e-09	-9.90099	2.491	EDI_002750	96	0	1	0	0	0	1	surface associated	Yes	No	Yes	No
EHI_013960	82.2	3	DEAD/DEAH box helicase, putative	0.212	-1.48148	0.2935	EDI_051100	98	0	0	1	0	0	1	transcription / translation related	No	No	No	No
EHI_044890	112	4, 5	helicase, putative	0.0133	1.74	0.8185	EDI_246520	97	0	0	0	2	1	3	transcription / translation related	No	No	No	No
EHI_096510	30.8	1	MADS box transcription factor, putative	0.0526	3.656	2.4405	EDI_092490	95	6	0	0	0	0	6	transcription / translation related	No	No	No	No
EHI_119540	18.1	1	eukaryotic translation elongation factor 1 gamma, putative	0.184	-2.29358	29.8	EDI_023460	100	1	0	0	0	0	1	transcription / translation related	No	No	No	No
EHI_000780	190.5	1, 5	chromodomain-helicase-DNA-binding protein, putative	0.00063	2.277	0.9875	EDI_026450	94	1	0	0	0	1	2	transcription / translation related	Yes	No	No	No
EHI_011210	48	4, 5	translation elongation factor EF-1 alpha, putative	NF	NF	NF	EDI_134610	99	0	0	0	1	1	2	transcription / translation related	Yes	Yes	No	No
EHI_033250	58.8	3, 4, 5	polyadenylate-binding protein, putative	0.346	-1.3089	60.95	EDI_293130	56	0	0	2	1	1	4	transcription / translation related	Yes	Yes	No	No
EHI_044230	61	4	elongation factor-1alpha, putative	0.0706	3.056	1.6385	EDI_028570	94	0	0	0	1	0	1	transcription / translation related	Yes	No	No	No
EHI_060740	26.6	1, 3, 4, 5	URE3-BP sequence specific DNA binding protein	0.555	1.165	66.715	EDI_076560	96	4	0	2	4	1	11	transcription / translation related	Yes	Yes	No	No
EHI_093900	44	1, 4	DEAD/DEAH box helicase, putative	0.439	-1.26582	47.18	EDI_146140	100	2	0	0	4	0	6	transcription / translation related	Yes	Yes	No	No
EHI_102170	48.4	1, 3, 4, 5	translation elongation factor 1-alpha 1	0.000965	1.335	175.3	EDI_134610	99	6	0	17	63	7	93	transcription / translation related	Yes	Yes	No	No
EHI_108470	109	4, 5	TATA binding protein (TBP) associated factor 2	0.0679	3.761	0.9815	EDI_075900	98	0	0	0	3	2	5	transcription / translation related	Yes	No	No	No
EHI_121780	35	4	enhancer binding protein-1	0.0123	-2.63158	0.3755	EDI_169900	79	0	0	0	3	0	3	transcription / translation related	Yes	No	No	No
EHI_182670	26.3	3, 4	enhancer binding protein 2	0.172	-3.96825	64.66	EDI_251720	95	0	0	6	2	0	8	transcription / translation related	Yes	Yes	No	No
EHI_189490	93.4	3, 4, 5	elongation factor 2, putative	0.0137	1.723	159.4	EDI_034680	99	0	0	5	11	2	18	transcription / translation related	Yes	Yes	No	No
EHI_192400	57	5	Transcription factor Tfb2, putative	0.0541	-1.19474	0.05415	EDI_202520	95	0	0	0	0	1	1	transcription / translation related	Yes	No	No	No
EHI_188240	56.5	1	PRP40, Splicing factor [RNA processing and modification]	0.526	1.565	0.4455	EDI_158640	94	1	0	0	0	0	1	transcription / translation related	No	No	No	No
EHI_005150	99	4	TUDOR domain containing protein, putative	0.000722	2.263	65.835	EDI_219260	89	0	0	0	2	0	2	transcription / translation related	Yes	No	No	No
EHI_010740	73	4	Ubiquitin-protein ligase, putative	0.00505	6.412	0.7575	EDI_254980	84	0	0	0	1	0	1	Ubiquitin related	No	No	No	No
EHI_068470	34.9	2	COP9 signalosome subunit, putative	0.0649	2.409	11.34	EDI_103780	91	0	1	0	0	0	1	Ubiquitin related	No	No	No	Yes
EHI_122810	82	5	Putative zinc finger in N-recognin (UBR box), putative	0.00156	1.639	0.897	EDI_154570	74	0	0	0	0	1	1	Ubiquitin related	No	No	No	No
EHI_185410	45	3	26S protease regulatory subunit 8, putative	0.216	1.387	12.165	EDI_191970	97	0	0	3	0	0	3	Ubiquitin related	No	No	No	No
EHI_136180	52.3	1, 4	proteasome regulatory subunit, putative	0.142	-1.63132	3.538	EDI_202900	96	1	0	0	2	0	3	Ubiquitin related	No	Yes	No	No
EHI_020270	106	5	ubiquitin-activating enzyme, putative	0.327	-1.25628	10.938	EDI_059960	95	0	0	0	0	1	1	Ubiquitin related	Yes	No	No	No
EHI_066770	18.2	3, 4	Skp1 protein, putative	0.0197	-2.77008	29.4	EDI_018360	99	0	0	1	1	0	2	Ubiquitin related	Yes	No	No	No
EHI_083270	8.7	3	ubiquitin	2.08e-05	-8	10.6995	None	N/A	0	0	7	0	0	7	Ubiquitin related	Yes	No	No	No
EHI_148160	81.5	1, 4	cullin, putative	0.265	-1.26263	0.991	EDI_335130	95	1	0	0	1	0	2	Ubiquitin related	Yes	No	No	No
EHI_166800	11.1	1, 4, 5	ubiquitin	0.00458	-2.57069	0.381	None	N/A	3	0	0	6	2	11	Ubiquitin related	Yes	No	No	No
EHI_174180	18	4	Skp1 protein, putative	NF	NF	NF	EDI_018360	99	0	0	0	1	0	1	Ubiquitin related	Yes	No	No	No
112.m00115	73.1	2, 4	hypothetical protein	NF	NF	NF	None	N/A	0	1	0	1	0	2	Unknown (hypothetical)	No	No	No	No
270.m00054	198	5	hypothetical protein 270.t00009	0.941	1.001	0.0431	EDI_321520	86	0	0	0	0	1	1	unknown (hypothetical)	No	No	No	No
EHI_004520	23	2	hypothetical protein	0.227	3.713	0.0456	EDI_067030	95	0	1	0	0	0	1	Unknown (hypothetical)	No	No	No	No
EHI_008810	45.2	1	hypothetical protein	0.265	-1.89753	0.5855	EDI_287100	92	1	0	0	0	0	1	Unknown (hypothetical)	No	No	No	Yes
EHI_014070	79	4	conserved hypothetical protein	0.00843	-4.1841	1.2855	EDI_216980	96	0	0	0	1	0	1	Unknown (hypothetical)	No	No	No	No
EHI_014150	83.1	1	hypothetical protein, conserved	0.0264	-2.66667	0.0924	EDI_273920	92	1	0	0	0	0	1	Unknown (hypothetical)	No	No	No	No
EHI_016340	124.8	3	hypothetical protein	0.0126	-1.47059	0.1645	EDI_009850	86	0	0	1	0	0	1	Unknown (hypothetical)	No	No	No	No
EHI_019160	48.5	3	hypothetical protein	0.17	1.591	1.1125	EDI_204800	94	0	0	1	0	0	1	Unknown (hypothetical)	No	No	No	No
EHI_019630	23	1, 4, 5	hypothetical protein	0.000116	515.8	0.0793	EDI_199570	54	8	0	0	6	1	15	Unknown (hypothetical)	No	No	Yes	Yes
EHI_025410	54.3	3	hypothetical protein	0.536	-1.61812	0.387	EDI_070460	87	0	0	1	0	0	1	Unknown (hypothetical)	No	No	No	No
EHI_031640	53.8	1, 2	hypothetical protein, conserved	0.151	3.988	1.298	EDI_187040	96	1	1	0	0	0	2	Unknown (hypothetical)	No	No	No	No
EHI_038650	54	4	hypothetical protein 7.t00023	0.46	1.132	0.04655	EDI_259470	91	0	0	0	2	0	2	Unknown (hypothetical)	No	No	No	No
EHI_040580	23.7	3, 4	hypothetical protein	0.0221	234.7	0.06535	EDI_013550	98	0	0	3	1	0	4	Unknown (hypothetical)	No	No	No	No
EHI_040610	24.6	3	hypothetical protein	0.964	-1.02041	1.6295	EDI_013520	92	0	0	1	0	0	1	Unknown (hypothetical)	No	No	Yes	No
EHI_042100	30	5	hypothetical protein 11.t00024	0.747	1.155	0.04695	EDI_256990	88	0	0	0	0	1	1	unknown (hypothetical)	No	No	No	No
EHI_048540	111.9	3	hypothetical protein	0.168	1.084	7.9055	EDI_230120	94	0	0	2	0	0	2	Unknown (hypothetical)	No	No	No	No
EHI_050410	88.7	2, 4	hypothetical protein	0.101	3.21	0.4825	EDI_290950	91	0	1	0	2	0	3	Unknown (hypothetical)	No	No	No	No
EHI_050460	20.1	2	hypothetical protein	0.413	-1.6835	0.482	EDI_187090	90	0	2	0	0	0	2	Unknown (hypothetical)	No	No	No	No
EHI_051830	55.5	3	hypothetical protein	0.291	-1.19617	1.4985	EDI_160100	92	0	0	1	0	0	1	Unknown (hypothetical)	No	No	No	No
EHI_058490	51.8	1	hypothetical protein	0.152	-1.07527	0.0771	EDI_281590	83	1	0	0	0	0	1	Unknown (hypothetical)	No	No	No	No
EHI_065850	127	5	hypothetical protein 76.t00026	0.295	-1.29366	2.5745	EDI_198570	94	0	0	0	0	1	1	unknown (hypothetical)	No	No	No	No
EHI_068140	26.8	3	hypothetical protein	0.017	-4.14938	1.279	EDI_043330	91	0	0	1	0	0	1	Unknown (hypothetical)	No	No	No	No
EHI_075310	59.1	1, 2	hypothetical protein	0.272	382.5	0.04325	EDI_204760	47	2	2	0	0	0	4	Unknown (hypothetical)	No	No	No	Yes
EHI_087690	44.8	3	hypothetical protein	0.0282	140.8	0.05275	EDI_102140	44	0	0	3	0	0	3	Unknown (hypothetical)	No	No	Yes	No
EHI_088050	40.9	2	hypothetical protein	0.43	-1.21212	3.532	EDI_136740	91	0	1	0	0	0	1	Unknown (hypothetical)	No	No	No	No
EHI_092210	39.1	3	hypothetical protein	0.116	2.936	0.0447	EDI_154030	75	0	0	1	0	0	1	Unknown (hypothetical)	No	No	No	No
EHI_092290	144.7	3	hypothetical protein, conserved	0.521	-1.15075	3.2105	EDI_280170	97	0	0	1	0	0	1	Unknown (hypothetical)	No	No	No	No
EHI_092580	23.8	1	hypothetical protein	0.259	-1.76678	2.0705	EDI_111340	94	1	0	0	0	0	1	Unknown (hypothetical)	No	No	No	No
EHI_096190	65	4	hypothetical protein 6.t00015	0.304	1.63	0.1025	EDI_092190	83	0	0	0	1	0	1	Unknown (hypothetical)	No	No	No	No
EHI_100410	161	5	hypothetical protein 36.t00010	0.0114	-1.26743	0.6825	EDI_129780	86	0	0	0	0	1	1	unknown (hypothetical)	No	No	No	No
EHI_104230	23.2	1	hypothetical protein	0.0001	1012	0.04585	EDI_083080	64	1	0	0	0	0	1	Unknown (hypothetical)	No	No	No	Yes
EHI_104450	34	4	hypothetical protein 578.t00003	0.0726	1.369	11.49	EDI_077850	97	0	0	0	1	0	1	Unknown (hypothetical)	No	No	Yes	Yes
EHI_107030	120.7	3	hypothetical protein, conserved	0.0167	3.805	0.706	EDI_140980	95	0	0	1	0	0	1	Unknown (hypothetical)	No	No	No	No
EHI_110230	58.2	3	hypothetical protein	0.0697	2.261	0.08535	EDI_175120	90	0	0	1	0	0	1	Unknown (hypothetical)	No	No	No	No
EHI_110430	103	4	hypothetical protein 5.t00006	0.0949	-1.41844	1.044	EDI_066520	84	0	0	0	1	0	1	unknown (hypothetical)	No	No	No	No
EHI_113200	84.5	1	hypothetical protein	0.348	2.482	0.0433	EDI_078590	59	1	0	0	0	0	1	Unknown (hypothetical)	No	No	No	No
EHI_113980	31	5	hypothetical protein 298.t00004	0.835	-1.14286	0.247	EDI_189570	93	0	0	0	0	1	1	unknown (hypothetical)	No	No	Yes	Yes
EHI_120590	86.9	3	hypothetical protein	0.31	1.499	5.7315	EDI_308760	89	0	0	1	0	0	1	Unknown (hypothetical)	No	No	Yes	Yes
EHI_122890	71	5	hypothetical protein 59.t00005	0.638	-1.25628	0.419	EDI_154750	81	0	0	0	0	2	2	Unknown (hypothetical)	No	No	Yes	No
EHI_123250	69.7	1, 2	hypothetical protein, conserved	0.544	-1.30378	0.0989	EDI_242340	93	1	3	0	0	0	4	Unknown (hypothetical)	No	No	No	No
EHI_123280	41	4, 5	hypothetical protein 241.t00012	0.00587	-5.26316	6.2195	EDI_242370	95	0	0	0	1	1	2	Unknown (hypothetical)	No	No	No	No
EHI_128140	79	4	hypothetical protein 45.t00028	0.0411	2.875	0.04965	EDI_088650	81	0	0	0	1	0	1	unknown (hypothetical)	No	No	No	No
EHI_133780	23.2	1	hypothetical protein	0.0001	1012	0.04585	EDI_083080	66	1	0	0	0	0	1	Unknown (hypothetical)	No	No	No	Yes
EHI_133790	26.1	1, 2	hypothetical protein	0.0161	84.86	0.04375	EDI_063010	49	3	6	0	0	0	9	Unknown (hypothetical)	No	No	No	Yes
EHI_137950	35.4	3	hypothetical protein	0.324	1.438	0.1835	EDI_134060	92	0	0	1	0	0	1	Unknown (hypothetical)	No	No	No	No
EHI_138010	48	1	hypothetical protein	0.379	1.858	0.2015	EDI_134120	80	1	0	0	0	0	1	Unknown (hypothetical)	No	No	No	No
EHI_140180	88.2	3	hypothetical protein	0.000812	3.849	1.3945	EDI_043450	88	0	0	1	0	0	1	Unknown (hypothetical)	No	No	No	No
EHI_140310	75.9	3	hypothetical protein	0.211	-1.41443	3.479	EDI_043320	94	0	0	1	0	0	1	Unknown (hypothetical)	No	No	No	No
EHI_140760	23	4, 5	hypothetical protein 60.t00038	0.0998	2.273	0.08985	EDI_204430	86	0	0	0	3	6	9	Unknown (hypothetical)	No	No	No	No
EHI_146120	23.7	1, 2, 4	hypothetical protein	0.0001	59.07	0.0447	EDI_105270	65	24	6	0	6	0	36	Unknown (hypothetical)	No	No	Yes	Yes
EHI_146970	112.8	1, 5	hypothetical protein	0.579	1.361	0.2075	EDI_350070	86	2	0	0	0	1	3	Unknown (hypothetical)	No	No	Yes	No
EHI_148300	55.9	1	hypothetical protein	0.148	2.319	0.05605	EDI_195690	88	1	0	0	0	0	1	Unknown (hypothetical)	No	No	No	No
EHI_151970	36	5	hypothetical protein 2.t00074	0.306	1.539	0.04975	EDI_113270	92	0	0	0	0	1	1	Unknown (hypothetical)	No	No	No	No
EHI_152980	13.8	3	hypothetical protein	0.113	-3.95257	2.248	EDI_093180	96	0	0	2	0	0	2	Unknown (hypothetical)	No	No	No	Yes
EHI_153300	49.6	3	hypothetical protein	0.0683	-3.64964	0.04965	EDI_093470	85	0	0	3	0	0	3	Unknown (hypothetical)	No	No	No	No
EHI_154300	56	5	hypothetical protein 219.t00012	3.86e-06	5.33	0.768	EDI_336590	92	0	0	0	0	1	1	Unknown (hypothetical)	No	No	No	No
EHI_155500	37.6	1	hypothetical protein	0.000302	-3.01205	2.0755	EDI_306210	88	1	0	0	0	0	1	Unknown (hypothetical)	No	No	No	No
EHI_156370	36.6	1	hypothetical protein	0.0019	-3.04878	0.725	EDI_238070	95	1	0	0	0	0	1	Unknown (hypothetical)	No	No	No	No
EHI_158280	46	1	hypothetical protein	0.0234	-1.07643	0.0788	EDI_216610	86	1	0	0	0	0	1	Unknown (hypothetical)	No	No	No	No
EHI_158580	15.4	3	hypothetical protein	0.545	-1.33333	0.2045	EDI_036650	94	0	0	1	0	0	1	Unknown (hypothetical)	No	No	No	No
EHI_159490	27.4	1	hypothetical protein	0.0475	-25.641	4.8265	EDI_325420	94	2	0	0	0	0	2	Unknown (hypothetical)	No	No	No	No
EHI_160970	27	5	hypothetical protein 328.t00003	0.0574	3.325	0.0483	EDI_008380	87	0	0	0	0	1	1	Unknown (hypothetical)	No	No	No	No
EHI_163520	38	4	hypothetical protein 256.t00008	0.0563	-2.457	1.6045	EDI_222270	80	0	0	0	2	0	2	unknown (hypothetical)	No	No	Yes	No
EHI_164770	30	3	hypothetical protein	0.219	-1.12613	0.0819	EDI_028110	88	0	0	1	0	0	1	Unknown (hypothetical)	No	No	No	No
EHI_168250	23.2	1	hypothetical protein	0.627	-1.23305	0.671	EDI_252610	96	5	0	0	0	0	5	Unknown (hypothetical)	No	No	No	No
EHI_174190	104.3	1, 2	hypothetical protein	0.111	-3.40136	0.544	EDI_018190	72	2	3	0	0	0	5	Unknown (hypothetical)	No	No	No	No
EHI_174270	23.4	3	hypothetical protein	0.0468	2.487	0.0719	EDI_018010	92	0	0	1	0	0	1	Unknown (hypothetical)	No	No	No	Yes
EHI_179060	132	5	conserved hypothetical protein	0.497	1.3	0.247	EDI_091690	94	0	0	0	0	1	1	Unknown (hypothetical)	No	No	Yes	No
EHI_183300	24	4	hypothetical protein 28.t00041	0.456	-1.02881	0.1041	EDI_343800	83	0	0	0	1	0	1	unknown (hypothetical)	No	No	Yes	Yes
EHI_188750	56	2	hypothetical protein	0.298	1.29	0.04645	EDI_317180	91	0	1	0	0	0	1	Unknown (hypothetical)	No	No	No	No
EHI_192070	98.7	2	hypothetical protein	0.205	1.877	0.045	EDI_078680	93	0	5	0	0	0	5	Unknown (hypothetical)	No	No	No	No
EHI_192580	26	5	hypothetical protein 69.t00018	0.0375	-1.47275	0.12485	EDI_194790	96	0	0	0	0	1	1	Unknown (hypothetical)	No	No	No	No
EHI_193070	103.9	3	hypothetical protein	0.704	1.209	0.08335	EDI_134800	92	0	0	1	0	0	1	Unknown (hypothetical)	No	No	No	No
EHI_193490	26.4	3	hypothetical protein	9.79e-05	-4.46429	1.1495	EDI_272160	98	0	0	1	0	0	1	Unknown (hypothetical)	No	No	No	No
EHI_196570	23	1, 2, 3, 4, 5	hypothetical protein	0.0001	37.16	0.5525	EDI_039770	93	7	1	9	14	5	36	Unknown (hypothetical)	No	No	No	Yes
EHI_198890	229.4	1	hypothetical protein, conserved	0.0174	1.811	6.0555	EDI_210360	94	1	0	0	0	0	1	Unknown (hypothetical)	No	No	No	No
EHI_199680	144.4	1	hypothetical protein	0.000684	2.361	1.252	EDI_027490	91	2	0	0	0	0	2	Unknown (hypothetical)	No	No	No	No
EHI_041980	84.3	2	hypothetical protein, conserved	0.00138	4.122	3.874	EDI_315300	91	0	1	0	0	0	1	Unknown (hypothetical)	No	Yes	No	No
EHI_058920	35.3	2	hypothetical protein	2.98e-06	-154.083	34.81	EDI_105290	63	0	1	0	0	0	1	Unknown (hypothetical)	No	Yes	No	Yes
EHI_069380	61	3	hypothetical protein, conserved	0.000229	3.011	3.7995	EDI_278190	98	0	0	1	0	0	1	Unknown (hypothetical)	No	Yes	No	Yes
EHI_142220	76	5	hypothetical protein 18.t00003	NF	NF	NF	EDI_221080	96	0	0	0	0	1	1	Unknown (hypothetical)	No	Yes	No	No
EHI_010380	55.9	3	hypothetical protein	0.047	2.307	0.297	EDI_255190	96	0	0	1	0	0	1	Unknown (hypothetical)	Yes	No	Yes	No
EHI_012520	62.8	1	hypothetical protein	0.904	1.094	0.0814	EDI_129250	91	1	0	0	0	0	1	Unknown (hypothetical)	Yes	No	No	No
EHI_012580	33	1, 2	hypothetical protein, conserved	0.0001	5.133	0.7515	EDI_129180	91	1	1	0	0	0	2	Unknown (hypothetical)	Yes	No	No	No
EHI_013210	137.9	3	hypothetical protein	0.949	-1.41044	0.4495	EDI_298510	86	0	0	2	0	0	2	Unknown (hypothetical)	Yes	No	No	No
EHI_015300	36.4	1, 4	hypothetical protein, conserved	0.256	-1.57978	2.6905	EDI_238980	98	1	0	0	2	0	3	Unknown (hypothetical)	Yes	No	No	No
EHI_017610	300.4	2, 3	hypothetical protein, conserved	0.2	2.144	3.281	EDI_100810	97	0	2	1	0	0	3	Unknown (hypothetical)	Yes	No	No	No
EHI_024530	36.6	1	hypothetical protein	0.292	1.631	32.91	EDI_342090	91	2	0	0	0	0	2	Unknown (hypothetical)	Yes	Yes	Yes	Yes
EHI_025370	96.3	1	hypothetical protein	0.0001	-34.0136	0.4795	EDI_070500	85	1	0	0	0	0	1	Unknown (hypothetical)	Yes	Yes	No	No
EHI_025700	287.6	2	hypothetical protein	0.455	-1.84162	27.59	EDI_213610	77	0	1	0	0	0	1	Unknown (hypothetical)	Yes	No	Yes	No
EHI_031370	117.9	3	hypothetical protein	0.0405	-1.85529	1.3575	EDI_137450	91	0	0	1	0	0	1	Unknown (hypothetical)	Yes	Yes	No	No
EHI_045430	16	4	hypothetical protein 78.t00016	0.0221	17.77	0.112	EDI_049430	88	0	0	0	1	0	1	Unknown (hypothetical)	Yes	No	No	No
EHI_048560	19	4	hypothetical protein 107.t00003	0.00671	-3.92157	73.045	EDI_210340	87	0	0	0	1	0	1	Unknown (hypothetical)	Yes	Yes	No	No
EHI_050520	25	4	hypothetical protein 10.t00051	0.193	-2.95858	18.975	EDI_156800	90	0	0	0	1	0	1	Unknown (hypothetical)	Yes	Yes	No	Yes
EHI_053190	27	3	hypothetical protein, conserved	0.0953	-1.34409	89.97	EDI_231780	92	0	0	2	0	0	2	Unknown (hypothetical)	Yes	Yes	No	No
EHI_065710	22	2	hypothetical protein	0.891	-1.05708	2.748	EDI_199170	77	0	2	0	0	0	2	Unknown (hypothetical)	Yes	No	No	Yes
EHI_067080	33.9	2	hypothetical protein	0.691	1.072	0.06705	EDI_105250	81	0	2	0	0	0	2	Unknown (hypothetical)	Yes	No	No	No
EHI_068510	83	4	hypothetical protein 61.t00030	0.00427	-7.8125	4.266	EDI_103820	91	0	0	0	1	0	1	Unknown (hypothetical)	Yes	No	No	No
EHI_087790	43	5	hypothetical protein 20.t00054	0.071	4.416	3.718	EDI_130570	78	0	0	0	0	1	1	unknown (hypothetical)	Yes	Yes	Yes	Yes
EHI_092080	58	4	hypothetical protein 50.t00004	9.3e-06	-3.30033	18.785	EDI_134730	98	0	0	0	2	0	2	Unknown (hypothetical)	Yes	No	No	No
EHI_101240	95.6	3, 4, 5	nucleic acid binding related	0.264	1.426	65.165	EDI_231780	91	0	0	1	2	3	6	Unknown (hypothetical)	Yes	No	No	No
EHI_107300	33.9	1	hypothetical protein	0.142	2.345	0.4045	EDI_125470	75	4	0	0	0	0	4	Unknown (hypothetical)	Yes	No	No	Yes
EHI_110780	50.8	2, 4	hypothetical protein	0.0752	8.629	1.548	EDI_340710	84	0	1	0	1	0	2	Unknown (hypothetical)	Yes	No	No	No
EHI_118660	80	3	hypothetical protein	0.00762	-3.06748	0.6325	EDI_228920	86	0	0	1	0	0	1	Unknown (hypothetical)	Yes	No	No	No
EHI_129520	147.8	3, 5	hypothetical protein	0.631	-1.17647	0.7215	EDI_266930	85	0	0	6	0	2	8	Unknown (hypothetical)	Yes	No	No	No
EHI_134980	97.4	1	hypothetical protein	0.0825	-1.71527	0.3175	EDI_189350	95	1	0	0	0	0	1	Unknown (hypothetical)	Yes	No	No	No
EHI_141850	224.2	3	hypothetical protein	0.0264	4.358	1.103	EDI_270240	93	0	0	3	0	0	3	Unknown (hypothetical)	Yes	No	No	No
EHI_155210	99.6	2, 3	hypothetical protein	0.563	-1.41643	1.59	EDI_237780	73	0	1	1	0	0	2	Unknown (hypothetical)	Yes	No	No	No
EHI_163530	18.4	1	hypothetical protein	0.611	-1.13122	6.141	EDI_222280	91	1	0	0	0	0	1	Unknown (hypothetical)	Yes	No	Yes	No
EHI_166480	132.7	1, 3	hypothetical protein	0.00458	-2.57069	0.381	EDI_272820	90	1	0	5	0	0	6	Unknown (hypothetical)	Yes	No	No	No
EHI_166920	130.9	3	hypothetical protein	0.000812	-6.66667	45.515	EDI_278510	98	0	0	1	0	0	1	Unknown (hypothetical)	Yes	No	No	No
EHI_185590	117.4	3	hypothetical protein	0.219	-2.40964	0.1685	EDI_072450	89	0	0	1	0	0	1	Unknown (hypothetical)	Yes	No	No	No
EHI_190430	163	2, 4	hypothetical protein, conserved	0.3	1.27	2.4475	EDI_128250	93	0	6	0	1	0	7	Unknown (hypothetical)	Yes	No	No	No
EHI_192430	28.6	2, 4, 5	hypothetical protein	0.00741	4.853	0.2355	EDI_202550	90	0	13	0	7	4	24	Unknown (hypothetical)	Yes	No	No	No
EHI_197310	267.9	3	hypothetical protein	0.228	-1.04493	0.04315	EDI_002650	86	0	0	1	0	0	1	Unknown (hypothetical)	Yes	No	No	No
EHI_198580	22.6	3, 4	hypothetical protein	0.000953	1.988	12.93	EDI_094480	93	0	0	3	4	0	7	Unknown (hypothetical)	Yes	Yes	No	No
EHI_199660	21.7	2, 5	hypothetical protein	0.0831	-3.11526	42.975	EDI_027500	92	0	1	0	0	1	2	Unknown (hypothetical)	Yes	Yes	Yes	No
141.m00078	82	4	clathrin heavy chain, putative	0.211	-1.76056	3.243	EDI_237980	97	0	0	0	2	0	2	Vesicle coating (trafficking)	No	No	No	No
200.m00090	183.7	1, 4, 5	clathrin heavy chain, putative	0.753	-1.03413	32.745	EDI_237980	92	1	0	0	7	3	11	Vesicle coating (trafficking)	No	No	No	No
EHI_004590	91	4	coatomer complex subunit, putative	0.229	-1.5674	8.3715	EDI_144630	98	0	0	0	1	0	1	Vesicle coating (trafficking)	No	No	No	No
EHI_012500	97.2	3, 4, 5	coatomer gamma subunit, putative	0.0881	-2.71003	1.897	EDI_129270	92	0	0	2	1	1	4	Vesicle coating (trafficking)	No	No	No	No
EHI_038930	272.7	2, 3	Beige/BEACH domain protein, putative	0.0174	3.343	3.9605	EDI_070880	95	0	1	1	0	0	2	Vesicle coating (trafficking)	No	No	No	No
EHI_175480	82.4	1	Sec23 protein, putative	0.416	-1.02669	6.8855	EDI_154150	97	1	0	0	0	0	1	Vesicle coating (trafficking)	No	No	No	No
EHI_195080	70.3	1	Vacuolar sorting protein 9 (VPS9) domain, putative	0.165	2.227	0.4795	EDI_133870	95	1	0	0	0	0	1	Vesicle coating (trafficking)	No	No	No	No
gi103484580	183.7	3	Clathrin heavy chain	NF	NF	NF	EDI_237980	92	0	0	2	0	0	2	Vesicle coating (trafficking)	No	No	No	No
EHI_136210	41	4	soluble NSF attachment protein gamma isoform, putative	0.0234	-2.33645	2.4175	EDI_202860	93	0	0	0	1	0	1	Vesicle coating (trafficking)	No	Yes	No	No
EHI_009940	17	4	clathrin coat assembly protein, putative	0.392	-1.33511	8.1335	EDI_100440	100	0	0	0	1	0	1	Vesicle coating (trafficking)	Yes	Yes	No	No
EHI_023600	81	4	beta adaptin, putative	0.507	-1.42653	13.23	EDI_033000	99	0	0	0	1	0	1	Vesicle coating (trafficking)	Yes	Yes	No	No
EHI_079940	88.2	1	Exocyst complex component Sec10, putative	0.103	5.079	0.369	EDI_120020	94	1	0	0	0	0	1	Vesicle coating (trafficking)	Yes	No	No	No
*From Ehrenkaufer et al, 2007; NF = not found; TM = Transmembrane
IDs highlighted in green are those that were (1) not found in MS/MS data on trophozoite, and (2) not found in EST trophozoite data (AmoebaDB).
IDs highlighted in gray are those that were not found in MS/MS data on trophozoite only, but found in EST trophozoite data (AmoebaDB).
