# Supplementary material for: Proteomic Analysis of the Cyst Stage of Entamoeba histolytica
Source: PLoS Negl Trop Dis. 2012 May 8;6(5):e1643. doi: 10.1371/journal.pntd.0001643 (PMC3348168; doi:10.1371/journal.pntd.0001643)
Supplement: Table S4 — E. histolytica proteins detected in cyst samples that show 80% or less identity with E. dispar proteins. These are candidate proteins for development of diagnostic tool for both trophozoites and cysts of E. histolytica. (XLSX) [file pntd.0001643.s007.xlsx]

## Sheet: Table S4
E. histolytica Locus ID	MW (kDa)	Detected in sample: 1 = 8076; 2 = 4268; 3 = AM951; 4 = AM797; & 5 = CMS33-7132	Annotation	Transcriptome data*			E. dispar homolog		No. of spectrum counts in LC-MS/MS experiment						Protein category	Found in trophozoite protein DB (AmoebaDB)?	Found in trophozoite EST DB (AmoebaDB)?	TM domain	Predicted signal peptide
				p-value	fold change: cyst / troph	HM-1 expression	Locus ID	% identity	8076	4268	AM951	AM797	CMS33-7132	Total
EHI_083270	8.7	3	ubiquitin	2.08e-05	-8	10.6995	None	N/A	0	0	7	0	0	7	Ubiquitin related	Yes	No	No	No
EHI_102270	81	3, 4, 5	heat shock protein 90, putative	0.0951	-2.36967	27.775	None	N/A	0	0	10	1	1	12	enzymatic function	Yes	No	No	No
EHI_145970	166.1	3	Metallo-beta-lactamase, putative	0.647	-1.7762	0.524	None	N/A	0	0	1	0	0	1	enzymatic function	Yes	No	No	No
EHI_166800	11.1	1, 4, 5	ubiquitin	0.00458	-2.57069	0.381	None	N/A	3	0	0	6	2	11	Ubiquitin related	Yes	No	No	No
EHI_065240	218.9	1	receptor protein kinase, putative	0.104	5.011	0.459	EDI_078810	43	1	0	0	0	0	1	protein kinase	Yes	No	Yes	Yes
EHI_033250	58.8	3, 4, 5	polyadenylate-binding protein, putative	0.346	-1.3089	60.95	EDI_293130	56	0	0	2	1	1	4	transcription / translation related	Yes	Yes	No	No
EHI_070730	21.6	2	EhRacC (Amoebic Rho 2)	0.4	1.141	6.887	EDI_002630	60	0	2	0	0	0	2	GTPase / signal related	Yes	Yes	No	No
EHI_199110	23.6	2, 3	lysozyme, putative	0.0165	5.648	4.5695	EDI_092550	61	0	1	1	0	0	2	enzymatic function	No	Yes	No	Yes
EHI_058920	35.3	2	hypothetical protein	2.98e-06	-154.083	34.81	EDI_105290	63	0	1	0	0	0	1	Unknown (hypothetical)	No	Yes	No	Yes
EHI_110530	58	4	chromosome segregation protein SMC, putative	NF	NF	NF	EDI_340750	63	0	0	0	1	0	1	chromosome segregation associated	Yes	No	No	No
EHI_015290	30	4	C2 domain protein, putative	0.000136	91.49	0.05605	EDI_238990	67	0	0	0	3	0	3	Calcium binding / signal related	No	Yes	No	No
EHI_072050	214.2	2	chromosome segregation protein SMC, putative	0.0308	-4.1841	0.225	EDI_048910	67	0	1	0	0	0	1	chromosome segregation associated	Yes	Yes	No	No
EHI_155210	99.6	2, 3	hypothetical protein	0.563	-1.41643	1.59	EDI_237780	73	0	1	1	0	0	2	Unknown (hypothetical)	Yes	No	No	No
EHI_107300	33.9	1	hypothetical protein	0.142	2.345	0.4045	EDI_125470	75	4	0	0	0	0	4	Unknown (hypothetical)	Yes	No	No	Yes
EHI_065710	22	2	hypothetical protein	0.891	-1.05708	2.748	EDI_199170	77	0	2	0	0	0	2	Unknown (hypothetical)	Yes	No	No	Yes
EHI_025700	287.6	2	hypothetical protein	0.455	-1.84162	27.59	EDI_213610	77	0	1	0	0	0	1	Unknown (hypothetical)	Yes	No	Yes	No
EHI_012330	290.6	3	serine-threonine-isoleucine rich protein	0.455	-1.84162	27.59	EDI_213610	78	0	0	1	0	0	1	Miscellaneous proteins	Yes	No	Yes	No
EHI_087790	43	5	hypothetical protein 20.t00054	0.071	4.416	3.718	EDI_130570	78	0	0	0	0	1	1	unknown (hypothetical)	Yes	Yes	Yes	Yes
EHI_121780	35	4	enhancer binding protein-1	0.0123	-2.63158	0.3755	EDI_169900	79	0	0	0	3	0	3	transcription / translation related	Yes	No	No	No
EHI_065330	120.4	2, 3	Gal/GalNAc lectin subunit Igl2	0.00718	-5.10204	79.955	EDI_276450	79	0	1	1	0	0	2	surface associated	Yes	No	No	Yes
EHI_105330	51.8	3	coronin, putative	0.158	-1.71527	0.5035	EDI_062850	80	0	0	1	0	0	1	actin / actin binding protein	No	Yes	No	No
*From Ehrenkaufer et al, 2007; NF = not found; TM = Transmembrane
IDs highlighted in green are those that were (1) not found in MS/MS data on trophozoite, and (2) not found in EST trophozoite data (AmoebaDB).
IDs highlighted in gray are those that were not found in MS/MS data on trophozoite only, but found in EST trophozoite data (AmoebaDB).
