# Supplementary material for: Proteomic Analysis of the Cyst Stage of Entamoeba histolytica
Source: PLoS Negl Trop Dis. 2012 May 8;6(5):e1643. doi: 10.1371/journal.pntd.0001643 (PMC3348168; doi:10.1371/journal.pntd.0001643)
Supplement: Table S5 — E. histolytica proteins detected in 3 or more of 5 cyst samples. These are candidate proteins for development of diagnostic tool for both trophozoites and cysts of E. histolytica. (XLSX) [file pntd.0001643.s008.xlsx]

## Sheet: Table S5
E. histolytica Locus ID	MW (kDa)	Detected in sample: 1 = 8076; 2 = 4268; 3 = AM951; 4 = AM797; & 5 = CMS33-7132	Annotation	Transcriptome data*			E. dispar homolog		No. of spectrum counts in LC-MS/MS experiment						Protein category	Found in trophozoite protein DB (AmoebaDB)	Found in trophozoite EST DB (AmoebaDB)	TM domain	Predicted signal peptide
				p-value	fold change: cyst / troph	HM-1 expression	Locus ID	% identity	8076	4268	AM951	AM797	CMS33-7132	Total
EHI_009530	97.9	1, 2, 3, 4, 5	pyruvate phosphate dikinase	0.276	1.149	101.455	EDI_245170	99	2	1	16	4	1	24	protein kinase	Yes	Yes	No	No
EHI_098570	36.2	1, 2, 3, 4, 5	fructose-1,6-bisphosphate aldolase, putative	0.241	-1.48368	123.5	EDI_201730	99	4	7	5	9	6	31	enzymatic function	Yes	Yes	No	No
EHI_159150	42	1, 2, 3, 4, 5	actin	0.272	1.12	127.75	EDI_251490	99	14	1	28	22	20	85	actin / actin binding protein	Yes	Yes	No	No
EHI_167300	24.3	1, 2, 3, 4, 5	grainin 1	0.0401	-3.04878	67.3	EDI_060400	96	4	3	5	3	3	18	Calcium binding / signal related	Yes	Yes	No	Yes
EHI_199000	69.8	1, 2, 3, 4, 5	calponin homology domain protein, putative	0.61	-1.19617	17.51	EDI_033890	98	2	4	10	42	6	64	actin / actin binding protein	Yes	Yes	No	No
EHI_006810	27.5	1, 3, 4, 5	14-3-3 protein 3	0.442	-1.30378	24.695	EDI_070510	87	1	0	4	2	1	8	Protein-protein interaction	Yes	Yes	No	No
EHI_060740	26.6	1, 3, 4, 5	URE3-BP sequence specific DNA binding protein	0.555	1.165	66.715	EDI_076560	96	4	0	2	4	1	11	transcription / translation related	Yes	Yes	No	No
EHI_102170	48.4	1, 3, 4, 5	translation elongation factor 1-alpha 1	0.000965	1.335	175.3	EDI_134610	99	6	0	17	63	7	93	transcription / translation related	Yes	Yes	No	No
EHI_175050	62.6	1, 3, 4, 5	aspartyl-tRNA synthetase, putative	0.2	1.653	66.48	EDI_139190	98	1	0	2	1	2	6	enzymatic function	Yes	Yes	No	No
EHI_110180	246.6	2, 3, 4, 5	myosin heavy chain	0.153	-1.28041	40.945	EDI_175070	99	0	3	2	34	3	42	actin / actin binding protein	Yes	No	No	No
EHI_183510	185.9	1, 2, 3	nuclear pore protein, putative	0.752	1.186	3.236	EDI_334560	96	1	2	1	0	0	4	Miscellaneous proteins	Yes	No	Yes	Yes
EHI_004600	60.3	1, 3, 4	hydroxylamine reductase, putative	0.0651	-1.49701	14.51	EDI_144620	97	1	0	3	2	0	6	enzymatic function	Yes	No	No	No
EHI_130700	47.3	1, 3, 4	enolase, putative	0.995	-1.001	64.25	EDI_011730	99	1	0	13	2	0	16	enzymatic function	Yes	Yes	No	No
EHI_060860	33.5	1, 4, 5	D-3-phosphoglycerate dehydrogenase, putative	0.000575	-15.361	26.835	EDI_314570	90	1	0	0	2	1	4	enzymatic function	No	Yes	No	No
EHI_114220	271.5	1, 4, 5	C2 domain containing protein, putative	0.0001	3.665	1.1825	EDI_110860	94	1	0	0	1	1	3	Calcium binding / signal related	Yes	No	No	No
EHI_145840	26.3	1, 4, 5	peroxiredoxin, putative	0.154	-1.10742	207.15	EDI_044980	90	17	0	0	66	14	97	enzymatic function	Yes	Yes	No	No
EHI_166800	11.1	1, 4, 5	ubiquitin	0.00458	-2.57069	0.381	None	N/A	3	0	0	6	2	11	Ubiquitin related	Yes	No	No	No
EHI_167310	24.1	1, 4, 5	grainin 2	0.135	-3.64964	46.265	EDI_060410	95	8	0	0	4	2	14	Calcium binding / signal related	Yes	Yes	No	No
EHI_192430	28.6	2, 4, 5	hypothetical protein	0.00741	4.853	0.2355	EDI_202550	90	0	13	0	7	4	24	Unknown (hypothetical)	Yes	No	No	No
EHI_008200	35	3, 4, 5	glyceraldehyde-3-phosphate dehydrogenase, putative	0.571	-1.16009	112.3	EDI_060430	96	0	0	1	11	7	19	enzymatic function	Yes	Yes	No	No
EHI_033250	58.8	3, 4, 5	polyadenylate-binding protein, putative	0.346	-1.3089	60.95	EDI_293130	56	0	0	2	1	1	4	transcription / translation related	Yes	Yes	No	No
EHI_051060	127	3, 4, 5	pyruvate:ferredoxin oxidoreductase	0.94	-1.01833	109.25	EDI_233890	94	0	0	6	5	7	18	enzymatic function	Yes	Yes	No	No
EHI_052860	71.5	3, 4, 5	heat shock protein 70, putative	0.617	-1.002	80.795	EDI_315850	99	0	0	2	12	2	16	heat shock protein	Yes	Yes	No	No
EHI_087570	13.4	3, 4, 5	endoribonuclease L-PSP, putative	0.799	-2.10084	37.315	EDI_180210	99	0	0	4	1	1	6	enzymatic function	Yes	Yes	No	Yes
EHI_101240	95.6	3, 4, 5	nucleic acid binding related	0.264	1.426	65.165	EDI_231780	91	0	0	1	2	3	6	Unknown (hypothetical)	Yes	No	No	No
EHI_102270	81	3, 4, 5	heat shock protein 90, putative	0.0951	-2.36967	27.775	None	N/A	0	0	10	1	1	12	enzymatic function	Yes	No	No	No
EHI_104390	64.4	3, 4, 5	actin binding protein	0.581	-1.20048	42.2	EDI_146020	98	0	0	9	19	3	31	actin / actin binding protein	Yes	No	No	No
EHI_104630	95	3, 4, 5	filamin 2	0.841	1.03	31.395	EDI_145990	95	0	0	1	8	1	10	actin / actin binding protein	Yes	No	No	No
EHI_136160	45.1	3, 4, 5	calreticulin, putative	0.0836	-3.20513	46.33	EDI_202920	99	0	0	15	5	3	23	Calcium binding / signal related	Yes	Yes	No	Yes
EHI_148320	26.9	3, 4, 5	40S ribosomal protein S3	0.723	1.02	140.05	EDI_195710	99	0	0	2	1	1	4	ribosomal protein	Yes	Yes	No	No
EHI_159160	22.1	3, 4, 5	superoxide dismutase [Fe]	0.0307	-9.43396	75.69	EDI_325550	99	0	0	1	2	2	5	enzymatic function	Yes	No	No	No
EHI_188180	44.9	3, 4, 5	phosphoglycerate kinase, putative	0.0648	1.485	85.32	EDI_158700	99	0	0	2	2	2	6	protein kinase	Yes	Yes	No	No
EHI_189490	93.4	3, 4, 5	elongation factor 2, putative	0.0137	1.723	159.4	EDI_034680	99	0	0	5	11	2	18	transcription / translation related	Yes	Yes	No	No
EHI_199590	73.5	3, 4, 5	heat shock protein 70, putative	0.0489	-2.28833	66.135	EDI_027670	98	0	0	6	4	1	11	heat shock protein	Yes	Yes	No	Yes
*From Ehrenkaufer et al, 2007; NF = not found; TM = Transmembrane
IDs highlighted in green are those that were (1) not found in MS/MS data on trophozoite, and (2) not found in EST trophozoite data (AmoebaDB).
IDs highlighted in gray are those that were not found in MS/MS data on trophozoite only, but found in EST trophozoite data (AmoebaDB).
E. histolytica Locus ID shown in bold fonts are those that showed 90% or less identity with E. dispar proteins.
