# Supplementary material for: Proteomic Analysis of the Cyst Stage of Entamoeba histolytica
Source: PLoS Negl Trop Dis. 2012 May 8;6(5):e1643. doi: 10.1371/journal.pntd.0001643 (PMC3348168; doi:10.1371/journal.pntd.0001643)
Supplement: Table S7 — Host (human) proteins detected in cyst samples. Human proteins that were identified in at least 3 out of 5 E. histolytica cyst samples are shown in this Table. (XLSX) [file pntd.0001643.s010.xlsx]

## Sheet: Table S7
IPI Number	Annotation	Detected in no. of cyst samples
IPI00295663	Chymotrypsin-like elastase family member 3A	5
IPI00005778	Proteoglycan 3
IPI00023673	Galectin-3-binding protein
IPI00019359	Keratin, type I cytoskeletal 9
IPI00220327	Keratin, type II cytoskeletal 1
IPI00021304	Keratin, type II cytoskeletal 2 epidermal
IPI00009865	Keratin, type I cytoskeletal 10
IPI00027201	Mucin-2	4
IPI00004573	Polymeric Immunoglobulin receptor
IPI00007047	Protein S100-A8
IPI00027462	Protein S100-A9
IPI00217963	Keratin, type I cytoskeletal 16
IPI00006690	Eosinophil peroxidase
IPI00242956	IGGFC-binding protein
IPI00291737	Intelectin-1 (galactofuranose binding)
IPI00103436	Intelectin-2
IPI00249672	Isoform 1 of cub and zona pellucida-like domain-containing proteion 1
IPI00009750	Galectin-4 / galactoside-binding lectin 4	3
IPI00027722	chymotrypsin-like elastase family, member 2A
IPI00071824	cytoskeleton associated protein 2
IPI00418512	hypothetical protein (deleted in malignant brain tumors 1 protein)
IPI00470929	chymotrypsin C (caldecrin)
IPI00552152	X-prolyl aminopeptidase (aminopeptidase P) 2, membrane-bound
IPI00645992	N-acylsphingosine amidohydrolase (non-lysosomal ceramidase) 2
IPI00791156	Isoform 1 of Keratin, type I cytoskeletal 13
IPI00792454	Isoform 1 of Keratin, type I cytoskeletal 13
IPI00847793	Dermcidin
IPI00930614	Isoform 1 of Keratin, type I cytoskeletal 13
IPI00964840	Immunoglobulin J chain
IPI01014324	Calcium-activated chloride channel regulator 1
IPI01014468	glycoprotein 2 (zymogen granule membrane)
Proteins shown in bold fonts are those that showed significantly higher mRNA transcripts in patients with acute amebic colitis (Peterson et al., 2011).
