# Supplementary material for: Proteomic Analysis of the Cyst Stage of Entamoeba histolytica
Source: PLoS Negl Trop Dis. 2012 May 8;6(5):e1643. doi: 10.1371/journal.pntd.0001643 (PMC3348168; doi:10.1371/journal.pntd.0001643)
Supplement: Table S8 — Bacterial species detected in 3 or more E. histolytica cyst samples. Many bacterial peptides were identified in the E. histolytica cyst samples by LC-MS/MS experiments. From the database search using the peptide sequences, the bacterial species were identified. At least 19 bacterial species were detected in 3 or more E. histolytica cyst samples. (XLSX) [file pntd.0001643.s011.xlsx]

## Sheet: Table S8
ID	Detected in no. of cyst samples	Bacterial sp.	Bacterial species-specific total spectrum count	Gram +/-	Annotation of protein detected
gi|291542948	4	Ruminococcus bromii	620	(+)	carbohydrate ABC transporter substrate-binding protein
gi|197303197	4	Ruminococcus lactaris			hypothetical protein
gi|153810502	5	Ruminococcus obeum			hypothetical protein
gi|153809663	4	Ruminococcus obeum			hypothetical protein
gi|153812727	4	Ruminococcus obeum			hypothetical protein
gi|153813627	4	Ruminococcus obeum			hypothetical protein
gi|153809694	3	Ruminococcus obeum			hypothetical protein
gi|153812328	3	Ruminococcus obeum			hypothetical protein
gi|253577788	5	Ruminococcus sp.			conserved hypothetical protein
gi|253579526	5	Ruminococcus sp.			ABC sugar transporter
gi|253580923	5	Ruminococcus sp.			predicted protein
gi|253579616	4	Ruminococcus sp.			extracellular solute-binding protein, family 1
gi|253579691	4	Ruminococcus sp.			extracellular solute-binding protein, family 1
gi|253580133	4	Ruminococcus sp.			polar amino acid ABC transporter
gi|253580185	4	Ruminococcus sp.			conserved hypothetical protein
gi|253577979	3	Ruminococcus sp.			conserved hypothetical protein
gi|253578498	3	Ruminococcus sp.			triosephosphate isomerase
gi|253578500	3	Ruminococcus sp.			conserved hypothetical protein
gi|253579184	3	Ruminococcus sp.			periplasmic binding protein/LacI transcriptional regulator
gi|253579533	3	Ruminococcus sp.			conserved hypothetical protein
gi|253580018	3	Ruminococcus sp.			extracellular solute-binding protein family 5
gi|253581166	3	Ruminococcus sp.			conserved hypothetical protein
gi|153816274	3	Ruminococcus torques			hypothetical protein
gi|281420920	5	Prevotella copri	273	(-)	NADP-specific glutamate dehydrogenase
gi|281421937	5	Prevotella copri			OmpA family protein
gi|281422265	4	Prevotella copri			translation elongation factor Tu
gi|281422333	4	Prevotella copri			fumarate reductase, flavoprotein subunit
gi|281419885	3	Prevotella copri			phosphoglycerate kinase
gi|281420085	3	Prevotella copri			pyruvate:ferredoxin (flavodoxin) oxidoreductase
gi|281422334	3	Prevotella copri			fumarate reductase, iron-sulfur protein
gi|281422476	3	Prevotella copri			triose-phosphate isomerase
gi|281422562	3	Prevotella copri			MotA/TolQ/ExbB proton channel family protein
gi|281422575	3	Prevotella copri			putative outer membrane protein
gi|160944117	5	Faecalibacterium prausnitzii	121	(+)	hypothetical protein
gi|160943041	4	Faecalibacterium prausnitzii			hypothetical protein
gi|160945636	4	Faecalibacterium prausnitzii			hypothetical protein
gi|16129715	4	Escherichia coli	93	(-)	glutamate dehydrogenase
gi|15800816	3	Escherichia coli			outer membrane protein A
gi|150016374	3	Clostridium beijerinckii	87	(+)	hypothetical protein
gi|145559419	3	Clostridium nexile			elongation factor Tu
gi|160881281	5	Clostridium phytofermentans			L-fucose isomerase
gi|160878984	3	Clostridium phytofermentans			glutamate dehydrogenase
gi|167768142	3	Clostridium sp.			hypothetical protein
gi|218283305	4	Eubacterium biforme	86	(+)	hypothetical protein
gi|225026273	4	Eubacterium hallii			hypothetical protein
gi|225025859	3	Eubacterium hallii			hypothetical protein
gi|154484392	4	Eubacterium ventriosum			hypothetical protein
gi|154484683	3	Eubacterium ventriosum			hypothetical protein
gi|258646113	4	Dialister invisus	53	(-)	methylmalonyl-CoA mutase, large subunit
gi|258646119	4	Dialister invisus			methylmalonyl-CoA decarboxylase, alpha subunit
gi|153855107	3	Dorea longicatena	30	(+)	hypothetical protein
gi|153855058	3	Dorea longicatena			hypothetical protein
gi|224541492	3	Catenibacterium mitsuokai	28	(+)	hypothetical protein
gi|224543627	3	Catenibacterium mitsuokai			hypothetical protein
gi|16802603	5	Listeria monocytogenes	27	(+)	glutamate dehydrogenase
gi|261367444	3	Subdoligranulum variabile	26	(-)	putative lipoprotein
gi|261368064	3	Subdoligranulum variabile			glyceraldehyde-3-phosphate dehydrogenase
gi|261369044	3	Subdoligranulum variabile			maltose-binding protein
gi|15901835	3	Streptococcus pneumoniae	18	(+)	glyceraldehyde-3-phosphate dehydrogenase
gi|15599784	3	Pseudomonas aeruginosa	17	(-)	glutamate dehydrogenase
gi|32035015	3	Actinobacillus pleuropneumoniae	15	(-)	Phosphoenolpyruvate carboxykinase
gi|257789920	3	Eggerthella lenta	13	(+)	Non-specific serine/threonine protein kinase
gi|269798818	3	Veillonella parvula	10	(-)	methylmalonyl-CoA mutase
gi|238927707	3	Selenomonas flueggei	9	(-)	methylmalonyl-CoA mutase
gi|139438017	3	Collinsella aerofaciens	7	(+)	Hypothetical protein
gi|226323050	3	Coprococcus comes	7	(+)	hypothetical protein
